# Supplementary material for: Trimetallaborides as starting points for the syntheses of large metal-rich molecular borides and clusters
Source: Royal Society of Chemistry journal article supplement (doi:10.1039/c5sc03206g), 2015-10-20
Supplement: c5sc03206g1.pdf [file c5sc03206g1.pdf]

Supporting Information for:

Trimetallaborides as Starting Points for the Syntheses of Large Metal-Rich Molecular Borides  
and Clusters

Holger Braunschweig, William C. Ewing, Thomas Kramer, Sundargopal Ghosh, Sebastian  
Östreicher, Alfredo Vargas, James Mattock and Christine Werner

[h.braunschweig@uni-wuerzburg.de](mailto:h.braunschweig@uni-wuerzburg.de)

## Experimental

**Materials:**  $\text{Li}[\{(\text{CO})_2\text{CpMn}\}_2\text{B}]$  (**1**),<sup>1</sup> dimethylsulfide gold and copper chlorides (DMS–AuCl, DMS–CuCl) and 1,3-(4-tolyl)imidazol-2-ylidene copper chloride (ITol–CuCl),<sup>2</sup> and  $\text{Li}[\{(\text{CO})_2\text{CpMn}\}_2\text{B}\{\text{Pt}(\text{PCy}_3)\}]$  (**6**),<sup>3</sup> were prepared by literature methods.

**Physical Methods:** All manipulations were performed either under an atmosphere of dry argon or in vacuo using standard Schlenk line or glovebox techniques. All solvents (including DMS) were dried and degassed as according to literature methods, and stored under inert environments.<sup>4</sup> NMR spectra in solution were acquired on a Bruker Avance 400 (<sup>1</sup>H: 400.1 MHz, <sup>11</sup>B{<sup>1</sup>H}: 128.4 MHz, <sup>13</sup>C{<sup>1</sup>H}: 100.6 MHz). <sup>1</sup>H NMR and <sup>13</sup>C NMR spectra were referenced to external TMS *via* residual protons of the solvent (<sup>1</sup>H) or the solvent itself (<sup>13</sup>C) and <sup>11</sup>B{<sup>1</sup>H} NMR spectra were referenced to external Et<sub>2</sub>O·BF<sub>3</sub>. IR spectra were acquired on a JASCO FT/IR-6200 type A spectrometer. Elemental analysis was performed on Vario MICRO Cube Elemental Analyzer.

**Crystallographic Details:** All structures were solved using direct methods, refined with the Shelx software package<sup>5</sup> and expanded using Fourier techniques. The *ShelXL* was interfaced with *ShelXLe* GUI for most of the refinement steps.<sup>6</sup> The pictures of molecules were prepared using *Pov-Ray* 3.6.2.<sup>7</sup> Additional details on refinement can be found in CIF files, which can be obtained from The Cambridge Crystallographic Data Centre via [www.ccdc.cam.ac.uk/data\\_request/cif](http://www.ccdc.cam.ac.uk/data_request/cif) under CCDC 1420470 (**2**), CCDC 1420471 (**3**), CCDC 1420472 (**4**), and CCDC 1420473 (**7**).

For 2:

The crystal data of **2** were collected on a Bruker X8-APEX II diffractometer with a CCD area detector and multi-layer mirror monochromated Mo<sub>K $\alpha$</sub>  radiation. Hydrogen atoms were included in structure factors calculations. All hydrogen atoms were assigned to idealised geometric positions.

Crystal data for **2**: C<sub>28</sub>H<sub>20</sub>B<sub>2</sub>Cu<sub>2</sub>Mn<sub>4</sub>O<sub>8</sub>,  $M_r = 852.90$ , orange block, 0.26×0.19×0.12 mm<sup>3</sup>, Monoclinic space group  $P2_1/c$ ,  $a = 12.6570(12)$  Å,  $b = 17.3227(16)$  Å,  $c = 13.6878(13)$  Å,  $\beta = 91.065(4)^\circ$ ,  $V = 3000.6(5)$  Å<sup>3</sup>,  $Z = 4$ ,  $\rho_{\text{calcd}} = 1.888$  g·cm<sup>-3</sup>,  $\mu = 3.072$  mm<sup>-1</sup>,  $F(000) = 1680$ ,  $T = 100(2)$  K,  $R_I = 0.0396$ ,  $wR^2 = 0.0780$ , 6139 independent reflections [ $2\theta \leq 52.74^\circ$ ] and 397 parameters.

For 3:

The crystal data of **3** were collected on a Bruker X8-Apex II diffractometer with a CCD area detector and multi-layer mirror monochromated Mo<sub>Kα</sub> radiation. All non-hydrogen atoms were refined anisotropically. Hydrogen atoms were included in structure factors calculations. All hydrogen atoms were assigned to idealised geometric positions.

Crystal data for **tsk100**: C<sub>28</sub>H<sub>20</sub>Au<sub>2</sub>B<sub>2</sub>Mn<sub>4</sub>O<sub>8</sub>,  $M_r = 1119.75$ , red block, 0.12×0.04×0.03 mm<sup>3</sup>, Monoclinic space group  $C2/c$ ,  $a = 17.4662(13)$  Å,  $b = 12.1607(9)$  Å,  $c = 15.4013(18)$  Å,  $\alpha = 119.822(2)^\circ$ ,  $V = 2838.1(4)$  Å<sup>3</sup>,  $Z = 4$ ,  $\rho_{\text{calcd}} = 2.621$  g·cm<sup>-3</sup>,  $\mu = 12.077$  mm<sup>-1</sup>,  $F(000) = 2080$ ,  $T = 100(2)$  K,  $R_I = 0.0195$ ,  $wR^2 = 0.0409$ , 3023 independent reflections [ $2\theta \leq 53.52^\circ$ ] and 200 parameters.

For 4:

The crystal data of **4** were collected on a Bruker X8-Apex II diffractometer with a CCD area detector and multi-layer mirror monochromated Mo<sub>Kα</sub> radiation. All non-hydrogen atoms were refined anisotropically. Hydrogen atoms were included in structure factors calculations. All hydrogen atoms were assigned to idealised geometric positions.

The displacement parameters of the fragments CuPCy<sub>3</sub> and PtPCy<sub>3</sub> were constrained to the same value.

The U<sub>ii</sub> displacement parameters of the fragments CuPCy<sub>3</sub> and PtPCy<sub>3</sub> were restrained with ISOR keyword to approximate isotropic behavior.

Crystal data for **4**:  $C_{50}H_{76}BCuMn_2O_4P_2Pt$ ,  $M_r = 1182.37$ , red block,  $0.24 \times 0.18 \times 0.11$  mm<sup>3</sup>, Triclinic space group  $P-1$ ,  $a = 11.1740(8)$  Å,  $b = 11.1760(8)$  Å,  $c = 19.8602(14)$  Å,  $\alpha = 83.931(2)^\circ$ ,  $\beta = 83.831(2)^\circ$ ,  $\gamma = 75.995(2)^\circ$ ,  $V = 2384.3(3)$  Å<sup>3</sup>,  $Z = 2$ ,  $\rho_{calcd} = 1.647$  g·cm<sup>-3</sup>,  $\mu = 3.993$  mm<sup>-1</sup>,  $F(000) = 1200$ ,  $T = 100(2)$  K,  $R_I = 0.0680$ ,  $wR^2 = 0.0966$ , 9725 independent reflections [ $2\theta \leq 52.74^\circ$ ] and 491 parameters.

#### For 7:

The crystal data of **7** were collected on a Bruker X8APEX diffractometer with a CCD area detector and multi-layer mirror monochromated  $Mo_{K\alpha}$  radiation. All non-hydrogen atoms were refined anisotropically. Hydrogen atoms were included in structure factors calculations. All hydrogen atoms were assigned to idealised geometric positions.

Crystal data for **7**:  $C_{70}H_{83}BCuMn_2N_2O_4PPt$ ,  $M_r = 1426.67$ , red block,  $0.21 \times 0.15 \times 0.08$  mm<sup>3</sup>, Triclinic space group  $P-1$ ,  $a = 12.516(2)$  Å,  $b = 13.405(3)$  Å,  $c = 19.099(4)$  Å,  $\alpha = 100.262(5)^\circ$ ,  $\beta = 97.963(5)^\circ$ ,  $\gamma = 95.107(5)^\circ$ ,  $V = 3101.3(10)$  Å<sup>3</sup>,  $Z = 2$ ,  $\rho_{calcd} = 1.528$  g·cm<sup>-3</sup>,  $\mu = 3.061$  mm<sup>-1</sup>,  $F(000) = 1452$ ,  $T = 100(2)$  K,  $R_I = 0.0642$ ,  $wR^2 = 0.0913$ , 13026 independent reflections [ $2\theta \leq 53.86^\circ$ ] and 753 parameters.

#### **Computational Details:**

For the investigation of potential closed shell interactions, geometry optimization was carried out using the Amsterdam Density Functional (ADF)<sup>8</sup> program at the OLYP/TZP.<sup>9</sup> All calculations were conducted within the zeroth-order regular approximation (ZORA) formalism.<sup>10</sup> To obtain

the singlet state, spin-restricted calculations were performed constraining the projection of the total electronic spin along a reference axis to 0. Frequency calculations were conducted to determine if each stationary point corresponds to a minimum. Reported bond orders are of the Mayer bond order type<sup>11</sup> and atomic charges were determined according to the Hirshfeld charge analysis.<sup>12</sup> Dispersion was included via the addition of the D3 version of Grimme's dispersion with Becke-Johnson damping.<sup>13</sup> The Jmol<sup>14</sup> program and the Graphical User Interface (ADF-GUI) – a part of the ADF package, were used for visualization purposes.

For the reported thermochemistry, calculations were performed in the Gaussian 09 software suite.<sup>15</sup> For compound **2** and its related thermochemistry, optimizations were carried out at the B3LYP/6-311+G(d,p) level of theory for all atoms and checked via frequency calculation to ensure the stationary point was a true minimum with no imaginary frequencies. The calculated electronic and free energies at 298.15 K are given in Table 1. For compound **3**, small atoms were calculated at the B3LYP/6-311+G(d,p) level, while Au and Mn were treated at with the LANL2DZ pseudopotential.

### Synthetic Details

$\{[(\eta^5\text{-C}_5\text{H}_5)_2(\text{CO})_4\text{Mn}_2]\text{BCu}\}_2$  (**2**): DMS–CuCl (5.0 mg, 0.031 mmol) was added to a solution of **1** (20 mg, 0.031 mmol) in toluene (1 mL) and stirred for 0.5 h at room temperature. The color of the reaction mixture changed from slightly yellow to red and a colorless precipitate formed.

After a complete conversion, indicated by the emergence of a <sup>11</sup>B NMR signal at 208 ppm, the solution was filtered and stored at –35 °C. Slow crystallization led to the isolation of red crystals of **2** suitable for X-ray diffraction. For (**2**): 12.1 mg (0.015 mmol, 46%) <sup>1</sup>H NMR (C<sub>6</sub>D<sub>6</sub>,

400.1 MHz):  $\delta = 4.58$  (s, 10H,  $C_5H_5$ ).  $^{11}B\{^1H\}$  NMR ( $C_6D_6$ , 128.4 MHz):  $\delta = 208$ .  $^{13}C\{^1H\}$  NMR ( $C_6D_6$ , 100.6 MHz):  $\delta = 225.7$  (CO), 84.3 (s,  $C_5H_5$ ). FT-IR (hexane): 1957 (br), 1942 (br), 1907 (br), 1878 (br), 1863 (br)  $cm^{-1}$ . Elemental analysis: calc'd (%): C: 39.43, H: 2.36; found (%): C: 40.22 H: 2.80.

**$\{[(\eta^5-C_5H_5)_2(CO)_4Mn_2]BAu\}_2$  (3)**: DMS–AuCl (4.6 mg, 0.016 mmol) was added to a solution of **1** (10 mg, 0.016 mmol) in toluene (1 mL) and stirred for 0.5 h at room temperature. The color of the reaction mixture changed from slightly yellow to red and a precipitate was formed. After a complete conversion in the  $^{11}B$  NMR spectrum to a low-field signal at 208 ppm was observed, the solution was filtrated and stored at  $-35$  °C. Slow crystallization led to the isolation of red crystals of **3** suitable for X-ray diffraction. For **3**: 3.2 mg (0.003 mmol, 17%).  $^1H$  NMR ( $C_6D_6$ , 400.1 MHz):  $\delta = 4.85$  (s, 10H,  $C_5H_5$ ).  $^{11}B\{^1H\}$  NMR ( $C_6D_6$ , 128.4 MHz):  $\delta = 208$ .  $^{13}C\{^1H\}$  NMR ( $C_6D_6$ , 100.6 MHz):  $\delta = 232.2$  (CO), 83.9 (s,  $C_5H_5$ ). FT-IR (hexane): 1986 (br), 1945 (br), 1927 (br), 1913 (br), 1878 (br)  $cm^{-1}$ . Elemental analysis: calc'd (%): C: 30.03, H: 1.80; found (%): C: 31.05 H: 1.75.

**$\{[(\eta^5-C_5H_5)_2(CO)_4Mn_2B][CuPCy_3][PtPCy_3]\}$  (4)**: Pt(PCy<sub>3</sub>)<sub>2</sub> (21.3 mg, 0.028 mmol) was added to a solution of **(2)** (12 mg, 0.014 mmol) in toluene (1 mL) and stirred for 4 at 60 °C. The color of the reaction mixture remained red, but in the  $^{11}B$  NMR spectrum a low-field shift to 215 ppm was observed. The solution was concentrated and stored at  $-35$  °C. After 4 weeks orange crystals of **4** suitable for X-ray diffraction were obtained. For **4**: 10.2 mg (0.009 mmol, 31%).  $^1H$  NMR ( $C_6D_6$ , 400.1 MHz):  $\delta = 4.75$  (s, 10H,  $C_5H_5$ ), 1.23 – 2.41 (br, 66H, PCy<sub>3</sub>).  $^{11}B\{^1H\}$  NMR ( $C_6D_6$ , 128.4 MHz):  $\delta = 215$ .  $^{13}C\{^1H\}$  NMR ( $C_6D_6$ , 100.6 MHz):  $\delta = 236.9$  (CO), 82.3 (s,  $C_5H_5$ ), 25.0 –

34.9 (br, PCy<sub>3</sub>). <sup>31</sup>P{<sup>1</sup>H} NMR (C<sub>6</sub>D<sub>6</sub>, 162.0 MHz): δ = 63.9 (s, PtPCy<sub>3</sub>, <sup>1</sup>J<sub>P-Pt</sub> = 4421 Hz), 13.4 (s, CuPCy<sub>3</sub>). FT-IR (hexane): 1946 (br), 1913 (br), 1873 (br), 1849 (br), 1793 (br), 1768 (br) cm<sup>-1</sup>. Elemental analysis: calc'd (%): C: 50.79, H: 6.47; found (%) C: 51.06 H: 6.75.

Alternative route to **4**: PCy<sub>3</sub>-CuCl (24.0 mg, 0.047 mmol) was added to a solution of **6** (30 mg, 0.047 mmol) in toluene (1 mL) and stirred for 0.5 h at room temperature. The color of the reaction mixture turned yellow and a white precipitate formed. In the <sup>11</sup>B NMR spectrum a low-field shift to 216 ppm was observed. The solution was filtered, concentrated and stored at -35 °C. After 12 h yellow crystals of **4** were obtained. Yield: 31 mg, 0.037 mmol, 79%.

**(η<sup>5</sup>-C<sub>5</sub>H<sub>5</sub>)<sub>2</sub>(CO)<sub>4</sub>Mn<sub>2</sub>B(PtPCy<sub>3</sub>)(CuITol) (7)**: ITol-CuCl (3.71 mg, 0.010 mmol) was added to a solution of **6** (10 mg, 0.010 mmol) in toluene (1 mL) and stirred for 2 h at room temperature. The color of the reaction mixture turned red as a white precipitate formed. A downfield shift of the <sup>11</sup>B NMR resonance to 226 ppm was observed. The solution was filtered, concentrated and stored at -35 °C. After four weeks, orange crystals of **7** suitable for X-ray diffraction were obtained. For **7**: 7.4 mg (0.006 mmol, 61%). <sup>1</sup>H NMR (C<sub>6</sub>D<sub>6</sub>, 400.1 MHz): δ = 7.65 (d, 4H, Tol), 7.03 (t, 4H, Tol), 6.47 (s, 2H, NHC), 4.38 (s, 10H, C<sub>5</sub>H<sub>5</sub>), 2.74 (m, 3H, PCy<sub>3</sub>), 2.18 (m, 6H, PCy<sub>3</sub>), 1.96 (s, 6H, Tol), 1.77 (m, 6H, PCy<sub>3</sub>), 1.63 (m, 6H, PCy<sub>3</sub>), 1.36 (m, 6H, PCy<sub>3</sub>), 1.20 (m, 6H, PCy<sub>3</sub>). <sup>11</sup>B{<sup>1</sup>H} NMR (C<sub>6</sub>D<sub>6</sub>, 128.4 MHz): δ = 226. <sup>13</sup>C{<sup>1</sup>H} NMR (C<sub>6</sub>D<sub>6</sub>, 100.6 MHz): δ = 214.3 (CO), 139.4 (Tol), 138.2 (Tol), 130.8 (Tol), 125.0 (Tol), 121.5 NHC), 82.0 (s, C<sub>5</sub>H<sub>5</sub>), 34.3 (PCy<sub>3</sub>), 30.7 (PCy<sub>3</sub>), 28.3 (PCy<sub>3</sub>), 27.2 (PCy<sub>3</sub>), 20.9 (Tol). <sup>31</sup>P{<sup>1</sup>H} NMR (C<sub>6</sub>D<sub>6</sub>, 162.0 MHz): δ = 55.3 (s, PtPCy<sub>3</sub>, <sup>1</sup>J<sub>P-Pt</sub> = 4269 Hz). FT-IR (hexane): 1948 (br), 1909 (br), 1859 (br), 1766 (br) cm<sup>-1</sup>. Elemental analysis: calc'd (%): C: 54.14, H: 5.44, N: 2.25; found (%) C: 54.29 H: 5.53, N: 2.13.

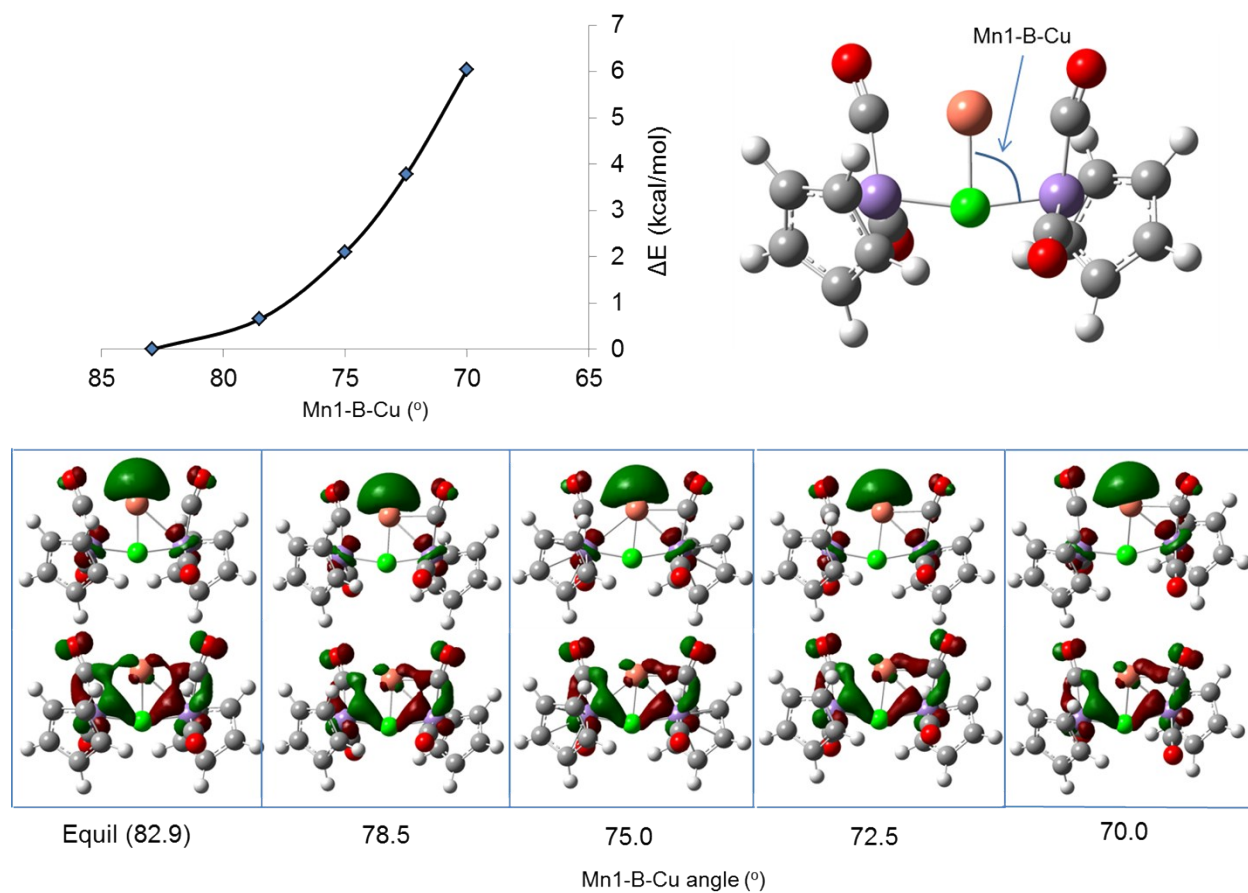

**Figure S1.** Evaluation of the potential energy changes involved in the movement of the Cu ion in 2a from a centrosymmetric position to a position closer to one of the two Mn atoms. Calculations were carried out at the B3LYP/6-311+G\*\* level for all atoms by fixing the Mn1-B-Cu angle and optimizing around this coordinate. In the Kohn-Sham molecular orbital depictions, the top figure is the LUMO for the partially-optimized structures, and the lower figure is the HOMO. The values of E used for the determination of  $\Delta E$  are not ZPE-corrected.



**Table 1.** Energies calculated for the reported thermochemical data. Energies are in Hartrees and calculated in the gas phase at 298.15 K. Optimizations and frequencies calculations were carried out using the B3LYP functional. For copper-containing compounds the 6-311+G(d,p) basis set was used for all atoms. For gold containing compounds the 6-311+G(d,p) basis set was used for all non-metals and the LANL2DZ pseudopotential was used for Mn and Au.

| Compound                              | E            | G            |
|---------------------------------------|--------------|--------------|
| <b>1•Cu<sup>0</sup></b>               | -4807.864936 | -4807.918751 |
| <b>1•Au<sup>0</sup></b>               | -1208.65455  | -1208.710171 |
| <b>2</b>                              | -9615.79298  | -9615.875567 |
| <b>3</b>                              | -2417.380441 | -2417.380441 |
| <b>1•Cu<sup>DMS</sup></b>             | -5285.889168 | -5285.952871 |
| <b>1•Au<sup>DMS</sup></b>             | -1686.676566 | -1686.740467 |
| <b>1•Cu<sup>PMe<sub>3</sub></sup></b> | -5268.963001 | -5268.029736 |
| <b>1•Au<sup>PMe<sub>3</sub></sup></b> | -1669.758054 | -1669.824634 |
| <b>1•Cu<sup>IMe</sup></b>             | -5112.685243 | -5112.752845 |
| <b>1•Au<sup>IMe</sup></b>             | -1513.481545 | -1513.548901 |
|                                       |              |              |
| <b>DMS</b>                            | -477.991357  | -478.018459  |
| <b>PMe<sub>3</sub></b>                | -461.052417  | -461.081485  |
| <b>IMe</b>                            | -304.754655  | -304.785764  |

**Table 2.** Relevant bond lengths and angles for **2**.

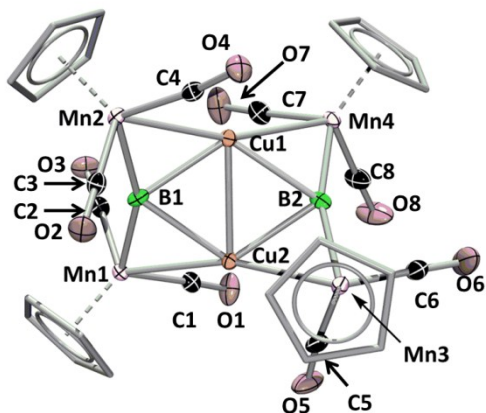

| bond    | length [Å] | atoms       | angle (°)  |
|---------|------------|-------------|------------|
| B1-Mn1  | 1.960(3)   | B2-Cu1-B1   | 111.13(12) |
| B1-Mn2  | 1.970(3)   | Cu1-B1-Cu2  | 67.96(10)  |
| B1-Cu1  | 2.186(3)   | B1-Cu2-B2   | 112.40(12) |
| B1-Cu2  | 2.238(3)   | Cu2-B2-Cu1  | 68.43(10)  |
| B2-Mn3  | 1.975(3)   | Mn1-B1-Mn2  | 161.95(19) |
| B2-Mn4  | 1.962(3)   | Mn3-B2-Mn4  | 157.05(19) |
| B2-Cu1  | 2.240(3)   | Mn2-Cu1-Mn4 | 162.90(2)  |
| B2-Cu2  | 2.156(3)   | Mn1-Cu2-Mn3 | 161.23(2)  |
| Cu1-Cu2 | 2.473(1)   |             |            |
| Cu1-Mn2 | 2.458(1)   |             |            |
| Cu1-Mn4 | 2.464(1)   |             |            |
| Cu2-Mn1 | 2.440(1)   |             |            |
| Cu2-Mn3 | 2.462(1)   | Mn1-C1-O1   | 173.0(3)   |
| Cu1-C4  | 2.430(3)   | Mn1-C2-O2   | 177.7(3)   |
| Cu1-C7  | 2.264(3)   | Mn2-C3-O3   | 178.3(3)   |
| Cu2-C1  | 2.315(3)   | Mn2-C4-O4   | 174.1(3)   |
| Cu2-C5  | 2.281(3)   | Mn3-C5-O5   | 171.0(2)   |
|         |            | Mn3-C6-O6   | 178.7(3)   |
| C1-O1   | 1.168(4)   | Mn4-C7-O7   | 172.8(2)   |
| C2-O2   | 1.165(4)   | Mn4-C8-O8   | 177.7(3)   |
| C3-O3   | 1.157(4)   |             |            |
| C4-O4   | 1.166(3)   |             |            |
| Mn1-C1  | 1.804(3)   |             |            |
| Mn1-C2  | 1.780(3)   |             |            |
| Mn2-C3  | 1.778(3)   |             |            |
| Mn2-C4  | 1.797(3)   |             |            |

|        |          |  |  |
|--------|----------|--|--|
| C5-O5  | 1.172(3) |  |  |
| C6-O6  | 1.162(3) |  |  |
| C7-O7  | 1.159(4) |  |  |
| C8-O8  | 1.167(3) |  |  |
| Mn3-C5 | 1.797(3) |  |  |
| Mn3-C6 | 1.778(3) |  |  |
| Mn4-C7 | 1.817(3) |  |  |
| Mn4-C8 | 1.775(3) |  |  |

**Table 3.** Relevant bond lengths and angles for **3**.

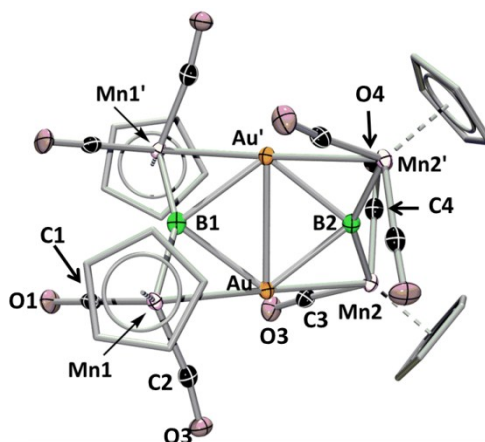

| bond    | length [Å] |  | atoms         | angle (°)  |
|---------|------------|--|---------------|------------|
| B1-Mn1  | 1.983(2)   |  | B2-Au-B1      | 104.48(12) |
| B1-Mn1' | 1.983(2)   |  | Au-B1-Au'     | 74.05(16)  |
| B1-Au   | 2.327(4)   |  | B1-Au'-B2     | 104.48(12) |
| B1-Au'  | 2.327(4)   |  | Au'-B2-Au     | 76.99(17)  |
| B2-Mn2  | 1.991(2)   |  | Mn1-B1-Mn1'   | 155.9(3)   |
| B2-Mn2' | 1.991(2)   |  | Mn2-B2-Mn2'   | 148.8(3)   |
| B2-Au   | 2.251(4)   |  | Mn1-Au-Mn2    | 178.47(2)  |
| B2-Au'  | 2.251(4)   |  | Mn1'-Au'-Mn2' | 178.47(2)  |
| Au-Au'  | 2.803(1)   |  |               |            |
| Au-Mn1  | 2.614(1)   |  |               |            |
| Au-Mn2  | 2.631(1)   |  |               |            |
|         |            |  |               |            |
|         |            |  | Mn1-C1-O1     | 178.4(3)   |

|        |          |  |           |          |
|--------|----------|--|-----------|----------|
|        |          |  | Mn1-C2-O2 | 169.7(3) |
| C1-O1  | 1.154(4) |  | Mn2-C3-O3 | 170.9(3) |
| C2-O2  | 1.156(4) |  | Mn2-C4-O4 | 177.8(3) |
| C3-O3  | 1.158(4) |  |           |          |
| C4-O4  | 1.153(4) |  |           |          |
| Mn1-C1 | 1.772(4) |  |           |          |
| Mn1-C2 | 1.830(4) |  |           |          |
| Mn2-C3 | 1.794(4) |  |           |          |
| Mn2-C4 | 1.769(4) |  |           |          |

**Table 4.** Relevant bond lengths and angles in **4**.

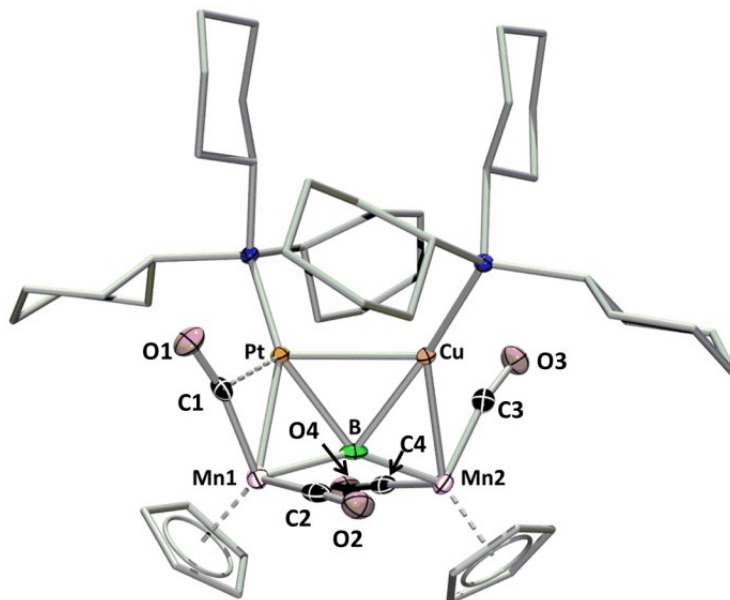

| bond    | length [Å] | atoms      | angle (°) |
|---------|------------|------------|-----------|
| B1-Mn1  | 1.970(6)   | Mn1-B1-Mn2 | 149.1(3)  |
| B1-Mn2  | 1.970(6)   | Cu1-B1-Pt1 | 75.19(18) |
| B1-Cu1  | 2.176(6)   | Mn1-B1-Pt1 | 72.02(18) |
| B1-Pt1  | 2.196(5)   | Mn1-B1-Cu1 | 130.1(3)  |
| Cu1-Mn1 | 2.623(3)   | Mn2-B1-Pt1 | 78.3(2)   |
| Pt1-Mn1 | 2.456(2)   | Mn2-B1-Cu1 | 135.2(3)  |
| Pt1-Cu1 | 2.668(3)   |            |           |
|         |            |            |           |
|         |            | Mn1-C1-O1  | 164.7(4)  |
| C1-O1   | 1.174(5)   | Mn1-C2-O2  | 178.1(4)  |
| C2-O2   | 1.176(6)   | Mn2-C3-O3  | 164.6(4)  |
| C3-O3   | 1.159(5)   | Mn2-C4-O4  | 177.8(4)  |
| C4-O4   | 1.170(6)   | Pt1-C1-O1  | 117.8(4)  |
| Mn1-C1  | 1.815(5)   | Cu1-C3-O3  | 116.7(4)  |
| Mn1-C2  | 1.756(6)   |            |           |
| Mn2-C3  | 1.824(5)   |            |           |
| Mn2-C4  | 1.756(5)   |            |           |
|         |            | B1-Cu1-P2  | 153.1(3)  |
| Pt1-C1  | 2.099(5)   | Mn2-Cu1-P2 | 145.0(2)  |
| Cu1-C3  | 2.275(5)   | B1-Pt1-P1  | 149.2(2)  |
| Pt1-P1  | 2.263(7)   | Mn1-Pt1-P1 | 155.3(2)  |

|        |          |  |  |
|--------|----------|--|--|
| Cu1-P2 | 2.259(9) |  |  |
|--------|----------|--|--|

**Table 5.** Relevant bond lengths and angles in **7**.

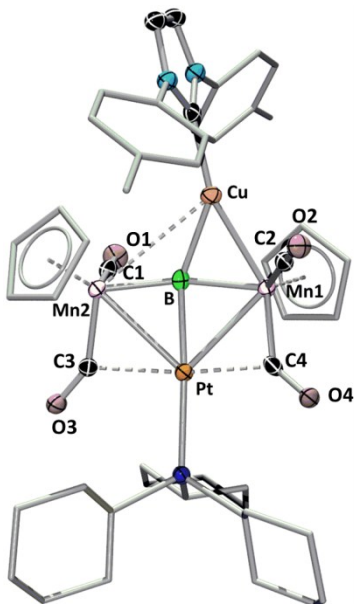

| bond    | length [Å] |  | atoms      | angle (°)  |
|---------|------------|--|------------|------------|
| B1-Mn1  | 1.907(5)   |  | Mn1-B1-Mn2 | 168.2(3)   |
| B1-Mn2  | 1.970(5)   |  | Cu1-B1-Pt1 | 155.1(3)   |
| B1-Cu1  | 2.055(5)   |  | Mn1-B1-Pt1 | 85.6(2)    |
| B1-Pt1  | 2.106(5)   |  | Mn1-B1-Cu1 | 115.2(3)   |
| Cu1-Mn1 | 3.347(1)   |  | Mn2-B1-Pt1 | 83.14(19)  |
| Cu1-Mn2 | 2.494(1)   |  | Mn2-B1-Cu1 | 76.52(17)  |
| Pt1-Mn1 | 2.707(1)   |  |            |            |
| Pt1-Mn2 | 2.731(1)   |  |            |            |
|         |            |  |            |            |
| C1-O1   | 1.176(5)   |  | Mn1-C1-O1  | 178.8(4)   |
| C2-O2   | 1.169(6)   |  | Mn1-C3-O3  | 147.6(4)   |
| C3-O3   | 1.173(5)   |  | Mn2-C2-O2  | 176.1(4)   |
| C4-O4   | 1.186(5)   |  | Mn2-C4-O4  | 140.0(3)   |
| Mn1-C1  | 1.747(5)   |  | Pt1-C3-O3  | 129.5(3)   |
| Mn1-C3  | 1.853(5)   |  | Pt1-C4-O4  | 134.5(3)   |
| Mn2-C2  | 1.769(5)   |  |            |            |
| Mn2-C4  | 1.933(5)   |  |            |            |
|         |            |  |            |            |
| Pt1-C3  | 2.253(4)   |  | B1-Cu1-C   | 147.57(19) |
| Pt1-C4  | 2.059(4)   |  | Mn2-Cu1-C  | 161.21(13) |
| Pt1-P   | 2.338(2)   |  | B1-Pt1-P   | 174.51(14) |
| Cu1-C   | 1.920(5)   |  |            |            |

**Table S6.** Coordinated for the optimized structures in the presence and absence of dispersion corrections. For the methods employed see the **Computational Details**. Columns are multi-page.

| <u>[(CO)<sub>2</sub>CpMn]<sub>2</sub>BAu]<sub>2</sub> without dispersion</u> |          |          |          | <u>[(CO)<sub>2</sub>CpMn]<sub>2</sub>BAu]<sub>2</sub> with dispersion</u> |          |          |          |
|------------------------------------------------------------------------------|----------|----------|----------|---------------------------------------------------------------------------|----------|----------|----------|
| Au                                                                           | 6.919333 | 10.05712 | 1.93568  | Au                                                                        | 6.932469 | 10.07047 | 1.920203 |
| Au                                                                           | 6.716622 | 10.05717 | 4.745432 | Au                                                                        | 6.704405 | 10.07075 | 4.760564 |
| O                                                                            | 6.37159  | 5.481425 | 1.325237 | O                                                                         | 6.440081 | 5.502096 | 1.517156 |
| O                                                                            | 7.594752 | 8.653916 | -0.8463  | O                                                                         | 7.74982  | 8.616136 | -0.80423 |
| O                                                                            | 3.952364 | 10.39174 | 0.566098 | O                                                                         | 3.893783 | 10.3208  | 0.651448 |
| O                                                                            | 3.659218 | 12.82483 | 3.751661 | O                                                                         | 3.819703 | 12.55462 | 4.09245  |
| O                                                                            | 7.267723 | 5.482672 | 5.354666 | O                                                                         | 7.19722  | 5.503902 | 5.164335 |
| O                                                                            | 6.040995 | 8.654205 | 7.527425 | O                                                                         | 5.885208 | 8.617857 | 7.484893 |
| O                                                                            | 9.683854 | 10.39102 | 6.11615  | O                                                                         | 9.74367  | 10.32122 | 6.029062 |
| O                                                                            | 9.977796 | 12.82098 | 2.928279 | O                                                                         | 9.816844 | 12.55491 | 2.588559 |
| C                                                                            | 7.053856 | 6.39898  | 1.588109 | C                                                                         | 7.122327 | 6.434314 | 1.717276 |
| C                                                                            | 7.734701 | 8.400316 | 0.294663 | C                                                                         | 7.844632 | 8.375934 | 0.34266  |
| C                                                                            | 4.733602 | 11.10739 | 1.073411 | C                                                                         | 4.655262 | 11.04543 | 1.170774 |
| C                                                                            | 4.521199 | 12.65567 | 2.96965  | C                                                                         | 4.57673  | 12.46823 | 3.196416 |
| C                                                                            | 9.99826  | 8.670789 | 2.667228 | C                                                                         | 9.798416 | 8.888432 | 2.897067 |
| C                                                                            | 10.25448 | 8.058899 | 1.409249 | C                                                                         | 10.23666 | 8.26974  | 1.696779 |
| C                                                                            | 9.984742 | 6.666656 | 1.52248  | C                                                                         | 10.06303 | 6.862901 | 1.824999 |
| C                                                                            | 9.556411 | 6.417547 | 2.862034 | C                                                                         | 9.506856 | 6.613459 | 3.113924 |
| C                                                                            | 9.559178 | 7.655694 | 3.567372 | C                                                                         | 9.336199 | 7.864859 | 3.774347 |
| C                                                                            | 7.438416 | 13.23868 | 0.570259 | C                                                                         | 7.300568 | 13.09514 | 0.652513 |
| C                                                                            | 6.976609 | 14.22861 | 1.481271 | C                                                                         | 6.953077 | 14.04226 | 1.653554 |
| C                                                                            | 5.618898 | 14.52081 | 1.16311  | C                                                                         | 5.597059 | 14.42374 | 1.448585 |
| C                                                                            | 5.241332 | 13.7223  | 0.049651 | C                                                                         | 5.103919 | 13.72097 | 0.316735 |
| C                                                                            | 6.368591 | 12.92304 | -0.31135 | C                                                                         | 6.160501 | 12.89342 | -0.1692  |
| C                                                                            | 6.584395 | 6.399575 | 5.092244 | C                                                                         | 6.514527 | 6.435743 | 4.963984 |
| C                                                                            | 5.901568 | 8.400455 | 6.386449 | C                                                                         | 5.791018 | 8.377461 | 6.337979 |
| C                                                                            | 8.902709 | 11.10672 | 5.608788 | C                                                                         | 8.982014 | 11.04583 | 5.510003 |
| C                                                                            | 9.115768 | 12.65329 | 3.710774 | C                                                                         | 9.059882 | 12.46866 | 3.484647 |
| C                                                                            | 3.638312 | 8.669873 | 4.013991 | C                                                                         | 3.837795 | 8.888585 | 3.783054 |
| C                                                                            | 3.382288 | 8.057372 | 5.271718 | C                                                                         | 3.399506 | 8.269906 | 4.983331 |
| C                                                                            | 3.652712 | 6.665289 | 5.157947 | C                                                                         | 3.573732 | 6.863111 | 4.855375 |
| C                                                                            | 4.081216 | 6.416895 | 3.818313 | C                                                                         | 4.130269 | 6.613681 | 3.566613 |
| C                                                                            | 4.077931 | 7.65534  | 3.113483 | C                                                                         | 4.300602 | 7.865048 | 2.906045 |
| C                                                                            | 6.198372 | 13.23861 | 6.109698 | C                                                                         | 6.335933 | 13.09383 | 6.029368 |
| C                                                                            | 6.66104  | 14.22832 | 5.198845 | C                                                                         | 6.682538 | 14.04154 | 5.028563 |
| C                                                                            | 8.018705 | 14.52002 | 5.517601 | C                                                                         | 8.038354 | 14.42385 | 5.233293 |
| C                                                                            | 8.395415 | 13.7214  | 6.631252 | C                                                                         | 8.532259 | 13.72103 | 6.364767 |



|    |          |          |          |
|----|----------|----------|----------|
| C  | 7.267651 | 12.92257 | 6.991781 |
| B  | 6.818351 | 8.152177 | 3.340486 |
| B  | 6.818249 | 11.88867 | 3.340343 |
| Mn | 5.740913 | 12.44048 | 1.719253 |
| Mn | 8.16072  | 7.731144 | 1.918566 |
| Mn | 7.896068 | 12.43966 | 4.96145  |
| Mn | 5.476246 | 7.730787 | 4.762421 |
| H  | 10.12886 | 9.718144 | 2.899426 |
| H  | 10.59317 | 8.570888 | 0.516409 |
| H  | 10.08769 | 5.928836 | 0.73647  |
| H  | 9.281899 | 5.456385 | 3.276559 |
| H  | 9.335396 | 7.791301 | 4.616089 |
| H  | 8.432654 | 12.81387 | 0.547592 |
| H  | 7.565108 | 14.69653 | 2.256143 |
| H  | 4.986975 | 15.24343 | 1.665613 |
| H  | 4.272542 | 13.71593 | -0.4348  |
| H  | 6.405148 | 12.19916 | -1.11668 |
| H  | 3.507574 | 9.717301 | 3.782178 |
| H  | 3.043462 | 8.568852 | 6.164795 |
| H  | 3.550113 | 5.927166 | 5.943719 |
| H  | 4.356223 | 5.455999 | 3.403478 |
| H  | 4.301694 | 7.791572 | 2.064846 |
| H  | 5.203939 | 12.81425 | 6.13185  |
| H  | 6.073042 | 14.69647 | 4.423747 |
| H  | 8.651121 | 15.24242 | 5.015405 |
| H  | 9.363939 | 13.71474 | 7.116229 |
| H  | 7.230536 | 12.19875 | 7.797141 |

|    |          |          |          |
|----|----------|----------|----------|
| C  | 7.476358 | 12.8926  | 6.850699 |
| B  | 6.818321 | 8.183076 | 3.340322 |
| B  | 6.818487 | 11.79473 | 3.340453 |
| Mn | 5.664857 | 12.34976 | 1.836354 |
| Mn | 8.180451 | 7.798831 | 2.007192 |
| Mn | 7.971904 | 12.34994 | 4.844801 |
| Mn | 5.455927 | 7.799785 | 4.673478 |
| H  | 9.788884 | 9.944518 | 3.097124 |
| H  | 10.60822 | 8.788438 | 0.824737 |
| H  | 10.28811 | 6.120714 | 1.073512 |
| H  | 9.225354 | 5.653712 | 3.517882 |
| H  | 8.967286 | 8.012591 | 4.77573  |
| H  | 8.255264 | 12.60437 | 0.558897 |
| H  | 7.604731 | 14.39631 | 2.432311 |
| H  | 5.03502  | 15.12493 | 2.048886 |
| H  | 4.103782 | 13.77799 | -0.08715 |
| H  | 6.097288 | 12.20116 | -0.99624 |
| H  | 3.847088 | 9.944642 | 3.582894 |
| H  | 3.027546 | 8.788557 | 5.85523  |
| H  | 3.348818 | 6.120948 | 5.606937 |
| H  | 4.412282 | 5.653983 | 3.162887 |
| H  | 4.669698 | 8.01276  | 1.904728 |
| H  | 5.381568 | 12.60241 | 6.123068 |
| H  | 6.030407 | 14.39553 | 4.250186 |
| H  | 8.599713 | 15.1257  | 4.633136 |
| H  | 9.532438 | 13.77862 | 6.768468 |
| H  | 7.540282 | 12.20008 | 7.677473 |

[(CO)<sub>2</sub>CpMn]<sub>2</sub>BCu]<sub>2</sub> without dispersion

|    |          |          |          |
|----|----------|----------|----------|
| Cu | 10.35544 | 16.44941 | 3.281967 |
| Cu | 8.697267 | 18.27904 | 3.055855 |
| O  | 8.002471 | 18.99922 | 5.972949 |
| O  | 7.700556 | 14.85315 | 6.042224 |
| O  | 7.281647 | 12.92061 | 3.249838 |
| O  | 10.90908 | 15.89732 | 6.224251 |
| O  | 11.8681  | 19.00633 | -0.04353 |
| O  | 7.737252 | 19.27889 | 0.363198 |
| O  | 11.3576  | 13.50575 | 3.406043 |
| O  | 11.25919 | 19.90623 | 6.268798 |
| C  | 7.663531 | 18.19857 | 5.179968 |

[(CO)<sub>2</sub>CpMn]<sub>2</sub>BAu]<sub>2</sub> dispersion

|    |          |          |          |
|----|----------|----------|----------|
| Cu | 10.29852 | 16.42076 | 3.399325 |
| Cu | 8.673323 | 18.18454 | 2.910584 |
| O  | 8.451097 | 18.80216 | 6.027508 |
| O  | 7.841427 | 14.62563 | 5.794591 |
| O  | 6.846282 | 13.31701 | 2.857463 |
| O  | 10.67062 | 16.17629 | 6.334405 |
| O  | 12.09412 | 19.16185 | 0.133762 |
| O  | 7.818899 | 19.10257 | 0.201583 |
| O  | 11.02561 | 13.35061 | 3.682856 |
| O  | 11.44845 | 20.12103 | 6.05289  |
| C  | 7.951595 | 18.06562 | 5.263792 |

|    |          |          |          |    |          |          |          |
|----|----------|----------|----------|----|----------|----------|----------|
| C  | 7.420963 | 15.6916  | 5.277191 | C  | 7.541428 | 15.57129 | 5.177282 |
| C  | 8.026462 | 13.67858 | 2.755702 | C  | 7.794685 | 13.91934 | 2.522161 |
| C  | 11.29078 | 16.63963 | 5.398581 | C  | 11.11962 | 16.81024 | 5.455329 |
| C  | 11.14215 | 19.40383 | 0.792906 | C  | 11.23639 | 19.47007 | 0.875892 |
| C  | 8.643573 | 19.48267 | 1.095618 | C  | 8.687958 | 19.33573 | 0.969368 |
| C  | 10.48794 | 14.09498 | 2.875323 | C  | 10.27644 | 13.98551 | 3.038937 |
| C  | 11.55181 | 19.08912 | 5.480731 | C  | 11.63141 | 19.21064 | 5.338459 |
| C  | 4.940371 | 17.85913 | 4.523682 | C  | 5.374806 | 18.30797 | 4.212698 |
| C  | 5.411026 | 18.26321 | 3.236506 | C  | 5.81013  | 18.08675 | 2.872931 |
| C  | 5.199725 | 15.96909 | 3.228823 | C  | 5.185983 | 16.05893 | 3.774314 |
| C  | 5.564026 | 17.09409 | 2.436991 | C  | 5.692595 | 16.68866 | 2.605666 |
| C  | 9.970148 | 15.74951 | 0.128543 | C  | 9.991249 | 16.20217 | 0.504598 |
| C  | 4.81942  | 16.4478  | 4.521274 | C  | 4.988916 | 17.06244 | 4.772064 |
| C  | 9.10116  | 13.61381 | 0.054281 | C  | 9.749315 | 13.94615 | 0.076465 |
| C  | 8.012255 | 14.54174 | 0.075397 | C  | 8.474953 | 14.56605 | -0.04627 |
| C  | 8.54982  | 15.8572  | 0.117077 | C  | 8.621591 | 15.95807 | 0.212676 |
| C  | 9.687995 | 21.53931 | 3.599595 | C  | 9.619146 | 21.18928 | 3.709612 |
| C  | 8.905405 | 21.88856 | 2.463472 | C  | 8.659711 | 21.50505 | 2.70932  |
| C  | 9.784617 | 22.16385 | 1.374478 | C  | 9.349363 | 22.00764 | 1.56409  |
| C  | 11.11514 | 21.97773 | 1.84283  | C  | 10.73594 | 21.99046 | 1.858121 |
| C  | 11.05814 | 21.60026 | 3.215363 | C  | 10.90709 | 21.49286 | 3.182849 |
| C  | 14.1419  | 18.52595 | 4.640445 | C  | 14.0745  | 18.30923 | 4.433264 |
| C  | 13.77887 | 18.71924 | 3.27367  | C  | 13.61159 | 18.55027 | 3.104712 |
| C  | 13.48992 | 17.44137 | 2.714521 | C  | 13.1365  | 17.31603 | 2.580082 |
| C  | 13.67542 | 16.46433 | 3.733518 | C  | 13.30891 | 16.31687 | 3.580919 |
| C  | 14.08749 | 17.13618 | 4.923848 | C  | 13.89825 | 16.93276 | 4.724421 |
| C  | 10.3036  | 14.36461 | 0.087163 | C  | 10.68337 | 14.96144 | 0.428686 |
| Mn | 6.889833 | 16.95569 | 4.150027 | Mn | 7.036227 | 16.95829 | 4.2165   |
| Mn | 9.138313 | 14.74956 | 1.901106 | Mn | 9.172712 | 14.82807 | 1.934305 |
| Mn | 10.05529 | 20.10143 | 1.989532 | Mn | 9.983208 | 20.01089 | 1.971183 |
| Mn | 12.11373 | 17.84758 | 4.355961 | Mn | 12.01238 | 17.8471  | 4.306875 |
| B  | 8.260385 | 16.07597 | 3.068155 | B  | 8.289227 | 16.06318 | 3.099165 |
| B  | 10.79672 | 18.68023 | 3.168658 | B  | 10.7377  | 18.66662 | 3.143942 |
| H  | 4.734113 | 18.51582 | 5.360128 | H  | 5.378986 | 19.25872 | 4.727    |
| H  | 5.588654 | 19.28149 | 2.914726 | H  | 6.129087 | 18.83846 | 2.166969 |
| H  | 5.202555 | 14.93429 | 2.913783 | H  | 5.021284 | 14.99902 | 3.890581 |
| H  | 5.866858 | 17.07871 | 1.399802 | H  | 5.945152 | 16.19848 | 1.679235 |
| H  | 10.67032 | 16.57172 | 0.112529 | H  | 10.41667 | 17.16199 | 0.735928 |
| H  | 4.494161 | 15.83526 | 5.35312  | H  | 4.637867 | 16.89747 | 5.779818 |
| H  | 9.02033  | 12.53471 | 0.01595  | H  | 9.962923 | 12.89476 | -0.04623 |
| H  | 6.96042  | 14.28489 | 0.038079 | H  | 7.548992 | 14.06397 | -0.28826 |

|   |          |          |          |
|---|----------|----------|----------|
| H | 7.988637 | 16.77783 | 0.087248 |
| H | 9.313525 | 21.29475 | 4.58395  |
| H | 7.823852 | 21.94477 | 2.431322 |
| H | 9.493222 | 22.45367 | 0.372314 |
| H | 12.01661 | 22.11636 | 1.25755  |
| H | 11.90478 | 21.42244 | 3.861716 |
| H | 14.42024 | 19.30453 | 5.340784 |
| H | 13.75306 | 19.66267 | 2.746107 |
| H | 13.21644 | 17.24931 | 1.686548 |
| H | 13.53463 | 15.3964  | 3.624776 |
| H | 14.30057 | 16.66921 | 5.877516 |
| H | 11.30702 | 13.95529 | 0.082898 |

|   |          |          |          |
|---|----------|----------|----------|
| H | 7.846601 | 16.70383 | 0.179782 |
| H | 9.411623 | 20.78733 | 4.686753 |
| H | 7.591591 | 21.36888 | 2.794113 |
| H | 8.898629 | 22.30768 | 0.629307 |
| H | 11.52876 | 22.28757 | 1.186068 |
| H | 11.84352 | 21.3549  | 3.696919 |
| H | 14.47527 | 19.05234 | 5.107805 |
| H | 13.60096 | 19.49643 | 2.587427 |
| H | 12.73162 | 17.16995 | 1.593324 |
| H | 13.02813 | 15.27738 | 3.498083 |
| H | 14.12464 | 16.44343 | 5.660386 |
| H | 11.73528 | 14.81333 | 0.623772 |

$\{(CO)_2CpMn\}_2B\{Cu(PCy_3)\}\{Pt(PCy_3)\}$   
without dispersion

|    |          |          |          |
|----|----------|----------|----------|
| Mn | 6.287589 | 6.960661 | 6.74922  |
| Mn | 6.70913  | 7.077202 | 2.918896 |
| B  | 6.890715 | 6.700542 | 4.885858 |
| O  | 7.563701 | 5.010592 | 8.592955 |
| C  | 7.279923 | 5.711871 | 7.668762 |
| O  | 4.00894  | 5.211083 | 6.18188  |
| C  | 4.978744 | 5.856994 | 6.385287 |
| O  | 8.682635 | 5.660192 | 1.267116 |
| C  | 7.926956 | 6.144436 | 2.036841 |
| O  | 8.618316 | 9.17798  | 3.660191 |
| C  | 7.886359 | 8.292803 | 3.400032 |
| C  | 6.675194 | 8.336058 | 8.420368 |
| H  | 7.309969 | 8.088915 | 9.262211 |
| C  | 7.09113  | 8.972069 | 7.217682 |
| H  | 8.089916 | 9.309669 | 6.979264 |
| C  | 5.959444 | 9.087    | 6.365626 |
| H  | 5.951059 | 9.556413 | 5.393219 |
| C  | 4.845301 | 8.516761 | 7.042202 |
| H  | 3.827477 | 8.464088 | 6.675003 |
| C  | 5.288052 | 8.051301 | 8.322008 |
| H  | 4.675754 | 7.567442 | 9.072837 |
| C  | 4.6103   | 6.512156 | 2.599164 |
| H  | 4.118981 | 5.643583 | 3.011317 |
| C  | 5.278232 | 6.602385 | 1.343489 |
| H  | 5.415275 | 5.798181 | 0.631924 |
| C  | 5.742418 | 7.938114 | 1.175363 |

$\{(CO)_2CpMn\}_2B\{Cu(PCy_3)\}\{Pt(PCy_3)\}$   
with dispersion

|    |          |          |          |
|----|----------|----------|----------|
| Mn | 6.366275 | 7.108947 | 6.803667 |
| Mn | 6.631512 | 7.090449 | 3.050144 |
| B  | 6.845865 | 6.774829 | 4.961521 |
| O  | 7.576569 | 5.229126 | 8.741378 |
| C  | 7.242279 | 5.854066 | 7.782785 |
| O  | 3.96756  | 5.560998 | 6.187802 |
| C  | 4.966142 | 6.134366 | 6.448388 |
| O  | 8.242864 | 5.407217 | 1.26035  |
| C  | 7.664645 | 5.998494 | 2.111356 |
| O  | 8.634511 | 9.119402 | 3.695164 |
| C  | 7.873001 | 8.260539 | 3.435069 |
| C  | 7.096173 | 8.494541 | 8.265531 |
| H  | 7.775724 | 8.2056   | 9.053452 |
| C  | 7.471157 | 8.950857 | 6.973085 |
| H  | 8.474559 | 9.074619 | 6.600224 |
| C  | 6.282847 | 9.153398 | 6.219617 |
| H  | 6.238869 | 9.492107 | 5.200017 |
| C  | 5.176996 | 8.821758 | 7.050599 |
| H  | 4.133797 | 8.8634   | 6.771686 |
| C  | 5.678471 | 8.414366 | 8.324415 |
| H  | 5.090823 | 8.079336 | 9.166283 |
| C  | 4.588579 | 6.465397 | 2.920894 |
| H  | 4.204551 | 5.557497 | 3.356109 |
| C  | 5.124055 | 6.632827 | 1.611769 |
| H  | 5.23866  | 5.858434 | 0.869425 |
| C  | 5.536059 | 7.985368 | 1.460052 |

|    |          |          |          |    |          |          |          |
|----|----------|----------|----------|----|----------|----------|----------|
| H  | 6.295472 | 8.321586 | 0.326826 | H  | 6.009293 | 8.414655 | 0.589028 |
| C  | 5.366701 | 8.66954  | 2.337301 | C  | 5.25611  | 8.654331 | 2.685577 |
| H  | 5.5708   | 9.718564 | 2.515918 | H  | 5.470423 | 9.691691 | 2.898548 |
| C  | 4.661646 | 7.792891 | 3.21036  | C  | 4.666613 | 7.720484 | 3.581233 |
| H  | 4.232646 | 8.049069 | 4.16615  | H  | 4.361787 | 7.910849 | 4.593879 |
| Pt | 8.583301 | 5.997659 | 5.998525 | Pt | 8.46559  | 5.894509 | 6.02665  |
| P  | 10.96603 | 5.755214 | 6.051831 | P  | 10.67215 | 5.407695 | 5.811623 |
| C  | 11.76907 | 7.09929  | 7.165109 | C  | 11.59041 | 6.534574 | 6.973077 |
| H  | 12.65771 | 6.601218 | 7.571334 | H  | 12.48472 | 5.989553 | 7.290895 |
| C  | 10.84984 | 7.474194 | 8.347164 | C  | 10.71527 | 6.820296 | 8.196337 |
| H  | 9.957175 | 7.966141 | 7.948626 | H  | 9.830298 | 7.357047 | 7.844491 |
| H  | 10.49249 | 6.58478  | 8.869641 | H  | 10.34668 | 5.899286 | 8.641785 |
| C  | 11.54913 | 8.409608 | 9.346571 | C  | 11.45194 | 7.66535  | 9.226034 |
| H  | 12.37968 | 7.875002 | 9.831043 | H  | 12.3167  | 7.105682 | 9.605596 |
| H  | 10.84698 | 8.674452 | 10.14789 | H  | 10.79606 | 7.858317 | 10.0818  |
| C  | 12.085   | 9.675683 | 8.670306 | C  | 11.9301  | 8.975193 | 8.612647 |
| H  | 11.24049 | 10.29317 | 8.331817 | H  | 11.05673 | 9.572525 | 8.322488 |
| H  | 12.64588 | 10.28618 | 9.389712 | H  | 12.49325 | 9.562647 | 9.345455 |
| C  | 12.96858 | 9.325656 | 7.4695   | C  | 12.78153 | 8.710552 | 7.376958 |
| H  | 13.89416 | 8.847938 | 7.823048 | H  | 13.69978 | 8.189311 | 7.676433 |
| H  | 13.27561 | 10.23903 | 6.9433   | H  | 13.08526 | 9.654822 | 6.912452 |
| C  | 12.26161 | 8.387795 | 6.474837 | C  | 12.03455 | 7.856668 | 6.356762 |
| H  | 11.41195 | 8.918806 | 6.029053 | H  | 11.14705 | 8.398697 | 6.01914  |
| H  | 12.95733 | 8.158434 | 5.663831 | H  | 12.66563 | 7.686086 | 5.48333  |
| C  | 11.92842 | 5.848837 | 4.410335 | C  | 11.42993 | 5.630652 | 4.150609 |
| H  | 12.96705 | 6.05271  | 4.704581 | H  | 12.50925 | 5.732126 | 4.305127 |
| C  | 11.4456  | 6.994332 | 3.497072 | C  | 10.89415 | 6.871991 | 3.446334 |
| H  | 11.4119  | 7.946625 | 4.023647 | H  | 10.95074 | 7.754024 | 4.073838 |
| H  | 10.42052 | 6.783454 | 3.189366 | H  | 9.836627 | 6.70293  | 3.253399 |
| C  | 12.33257 | 7.13687  | 2.249141 | C  | 11.6402  | 7.105042 | 2.138605 |
| H  | 11.93648 | 7.943461 | 1.619133 | H  | 11.24076 | 7.996781 | 1.644481 |
| H  | 13.34352 | 7.449379 | 2.551327 | H  | 12.69584 | 7.308184 | 2.362779 |
| C  | 12.41584 | 5.833793 | 1.446612 | C  | 11.53347 | 5.900209 | 1.211259 |
| H  | 13.13838 | 5.937378 | 0.626415 | H  | 12.1699  | 6.040071 | 0.330425 |
| H  | 11.44277 | 5.63431  | 0.983129 | H  | 10.50466 | 5.81932  | 0.859448 |
| C  | 12.80485 | 4.652043 | 2.341341 | C  | 11.91155 | 4.605452 | 1.922586 |
| H  | 13.85302 | 4.760583 | 2.656961 | H  | 12.98856 | 4.605262 | 2.136671 |
| H  | 12.75234 | 3.714448 | 1.772967 | H  | 11.71724 | 3.750908 | 1.269274 |
| C  | 11.91634 | 4.536706 | 3.594919 | C  | 11.16343 | 4.433485 | 3.241972 |
| H  | 10.88631 | 4.312098 | 3.296329 | H  | 10.08744 | 4.382122 | 3.068325 |
| H  | 12.26391 | 3.687532 | 4.187523 | H  | 11.45806 | 3.49651  | 3.71051  |

|    |          |          |          |    |          |          |          |
|----|----------|----------|----------|----|----------|----------|----------|
| C  | 11.63868 | 4.142326 | 6.826475 | C  | 11.27035 | 3.734913 | 6.327613 |
| H  | 11.24894 | 3.388992 | 6.128231 | H  | 10.68351 | 3.049092 | 5.711195 |
| C  | 13.17537 | 3.992884 | 6.885998 | C  | 12.75327 | 3.476413 | 6.073103 |
| H  | 13.59317 | 4.732512 | 7.579899 | H  | 13.34643 | 4.147684 | 6.701773 |
| H  | 13.63838 | 4.186803 | 5.915074 | H  | 13.0203  | 3.691257 | 5.038993 |
| C  | 13.59257 | 2.592311 | 7.370831 | C  | 13.10974 | 2.03196  | 6.412966 |
| H  | 13.29401 | 1.844001 | 6.62217  | H  | 12.55873 | 1.363327 | 5.739512 |
| H  | 14.68762 | 2.542477 | 7.435274 | H  | 14.17626 | 1.858753 | 6.233042 |
| C  | 12.96305 | 2.240636 | 8.723057 | C  | 12.75072 | 1.699391 | 7.855791 |
| H  | 13.22085 | 1.211316 | 9.004541 | H  | 12.97533 | 0.649549 | 8.072045 |
| H  | 13.38948 | 2.890118 | 9.501511 | H  | 13.37336 | 2.305513 | 8.526151 |
| C  | 11.44104 | 2.419049 | 8.689319 | C  | 11.28271 | 1.996901 | 8.134288 |
| H  | 11.01507 | 2.239575 | 9.684874 | H  | 11.04709 | 1.801234 | 9.18535  |
| H  | 11.00284 | 1.662127 | 8.024905 | H  | 10.66024 | 1.324662 | 7.536206 |
| C  | 11.03134 | 3.820596 | 8.206935 | C  | 10.93518 | 3.439637 | 7.78668  |
| H  | 9.943192 | 3.906905 | 8.176228 | H  | 9.885043 | 3.653386 | 7.985051 |
| H  | 11.38275 | 4.551435 | 8.944772 | H  | 11.52541 | 4.103999 | 8.423272 |
| Cu | 7.073072 | 4.731977 | 3.968425 | Cu | 7.246295 | 4.886642 | 3.964276 |
| P  | 6.678317 | 2.395    | 3.847934 | P  | 7.08158  | 2.695818 | 3.982913 |
| C  | 8.015852 | 1.448373 | 2.879456 | C  | 8.563593 | 1.728685 | 3.446326 |
| H  | 8.839348 | 1.464665 | 3.605293 | H  | 9.379761 | 2.143243 | 4.043354 |
| C  | 8.550905 | 2.170569 | 1.626808 | C  | 8.894566 | 1.971683 | 1.975547 |
| H  | 8.804209 | 3.205433 | 1.860148 | H  | 8.955983 | 3.039104 | 1.770367 |
| H  | 7.781621 | 2.212592 | 0.848515 | H  | 8.083138 | 1.573024 | 1.360847 |
| C  | 9.782502 | 1.449134 | 1.054269 | C  | 10.18805 | 1.263813 | 1.588495 |
| H  | 10.61291 | 1.522019 | 1.770538 | H  | 11.0155  | 1.690738 | 2.162441 |
| H  | 10.11308 | 1.966983 | 0.145108 | H  | 10.40503 | 1.442934 | 0.530497 |
| C  | 9.502939 | -0.0277  | 0.752933 | C  | 10.10332 | -0.23067 | 1.8721   |
| H  | 8.783495 | -0.10143 | -0.0756  | H  | 9.325997 | -0.67484 | 1.237587 |
| H  | 10.41884 | -0.52632 | 0.411116 | H  | 11.04728 | -0.72289 | 1.615408 |
| C  | 8.936882 | -0.75005 | 1.980816 | C  | 9.754355 | -0.48236 | 3.333862 |
| H  | 9.713942 | -0.81772 | 2.75577  | H  | 10.57125 | -0.11406 | 3.967473 |
| H  | 8.666181 | -1.78309 | 1.724925 | H  | 9.657876 | -1.55604 | 3.527381 |
| C  | 7.705415 | -0.02799 | 2.554993 | C  | 8.462735 | 0.230363 | 3.725455 |
| H  | 6.898205 | -0.0792  | 1.814494 | H  | 7.637396 | -0.18874 | 3.141769 |
| H  | 7.349508 | -0.56468 | 3.440196 | H  | 8.237419 | 0.04299  | 4.774629 |
| C  | 5.033533 | 1.883642 | 3.018648 | C  | 5.766084 | 2.054124 | 2.84198  |
| H  | 5.114778 | 0.795191 | 2.901659 | H  | 6.128195 | 1.089098 | 2.475738 |
| C  | 4.879051 | 2.509292 | 1.617263 | C  | 5.633642 | 3.014102 | 1.66086  |
| H  | 5.722998 | 2.239478 | 0.979358 | H  | 6.604899 | 3.222669 | 1.215805 |
| H  | 4.899017 | 3.599556 | 1.709684 | H  | 5.27257  | 3.964568 | 2.054809 |

|   |          |          |          |
|---|----------|----------|----------|
| C | 3.576873 | 2.081403 | 0.918343 |
| H | 3.500267 | 2.599281 | -0.04666 |
| H | 3.624466 | 1.006861 | 0.687991 |
| C | 2.337834 | 2.359994 | 1.77436  |
| H | 1.437504 | 1.981618 | 1.273665 |
| H | 2.199306 | 3.445171 | 1.88086  |
| C | 2.482215 | 1.724717 | 3.158973 |
| H | 1.62467  | 1.986333 | 3.791995 |
| H | 2.468974 | 0.62946  | 3.058531 |
| C | 3.775652 | 2.156241 | 3.87251  |
| H | 3.711353 | 3.220654 | 4.123586 |
| H | 3.835179 | 1.616868 | 4.819875 |
| C | 6.59932  | 1.435924 | 5.501148 |
| H | 5.978855 | 0.556674 | 5.275809 |
| C | 5.907978 | 2.261754 | 6.605843 |
| H | 4.950148 | 2.659428 | 6.275029 |
| H | 6.532901 | 3.128364 | 6.830664 |
| C | 5.70191  | 1.446198 | 7.89167  |
| H | 5.231541 | 2.086995 | 8.647463 |
| H | 4.997211 | 0.623203 | 7.699596 |
| C | 7.021567 | 0.880679 | 8.424353 |
| H | 7.646422 | 1.708163 | 8.783776 |
| H | 6.839697 | 0.228185 | 9.288225 |
| C | 7.770053 | 0.10938  | 7.33309  |
| H | 7.218996 | -0.81196 | 7.093025 |
| H | 8.754488 | -0.21082 | 7.698041 |
| C | 7.953639 | 0.928608 | 6.041109 |
| H | 8.606392 | 1.787168 | 6.241714 |
| H | 8.468306 | 0.299107 | 5.311831 |

|   |          |          |          |
|---|----------|----------|----------|
| C | 4.661084 | 2.477896 | 0.618183 |
| H | 4.563649 | 3.193751 | -0.20528 |
| H | 5.068039 | 1.553044 | 0.189456 |
| C | 3.297217 | 2.187935 | 1.234184 |
| H | 2.623021 | 1.75602  | 0.487236 |
| H | 2.847352 | 3.131967 | 1.565972 |
| C | 3.428088 | 1.256018 | 2.433404 |
| H | 2.449345 | 1.08817  | 2.895396 |
| H | 3.79697  | 0.279124 | 2.095847 |
| C | 4.395229 | 1.823802 | 3.468284 |
| H | 4.001712 | 2.777056 | 3.831224 |
| H | 4.466485 | 1.15425  | 4.326713 |
| C | 6.712636 | 2.035021 | 5.654731 |
| H | 6.368786 | 1.002646 | 5.534442 |
| C | 5.632565 | 2.867465 | 6.337701 |
| H | 4.756487 | 2.997376 | 5.711174 |
| H | 6.049676 | 3.86063  | 6.501951 |
| C | 5.240782 | 2.237957 | 7.667853 |
| H | 4.468206 | 2.8481   | 8.146014 |
| H | 4.800992 | 1.249752 | 7.477356 |
| C | 6.44539  | 2.099556 | 8.590759 |
| H | 6.759439 | 3.094604 | 8.904849 |
| H | 6.170421 | 1.5433   | 9.493738 |
| C | 7.616759 | 1.413892 | 7.895642 |
| H | 7.375103 | 0.356858 | 7.720419 |
| H | 8.496537 | 1.435908 | 8.542841 |
| C | 7.94565  | 2.058835 | 6.552761 |
| H | 8.236541 | 3.104795 | 6.680983 |
| H | 8.788522 | 1.543918 | 6.094642 |

$\{(\text{CO})_2\text{CpMn}\}_2\text{B}\{\text{Cu}(\text{ITol})\}\{\text{Pt}(\text{PCy}_3)\}$   
without dispersion

|    |          |          |          |
|----|----------|----------|----------|
| Pt | 7.308311 | 1.493381 | 4.291855 |
| Mn | 9.759415 | 1.309359 | 5.881208 |
| P  | 6.844125 | 3.256043 | 2.762623 |
| B  | 8.051362 | 0.33368  | 5.872384 |
| O  | 10.93763 | -1.31679 | 5.323704 |
| C  | 10.42937 | -0.27323 | 5.549484 |
| Cu | 7.321874 | -0.5418  | 7.790088 |
| Mn | 6.40038  | -0.69807 | 5.502085 |

$\{(\text{CO})_2\text{CpMn}\}_2\text{B}\{\text{Cu}(\text{ITol})\}\{\text{Pt}(\text{PCy}_3)\}$   
with dispersion

|    |          |          |          |
|----|----------|----------|----------|
| Pt | 7.485754 | 1.508704 | 4.489575 |
| Mn | 9.078792 | 1.865788 | 6.631013 |
| P  | 6.710268 | 3.087914 | 3.018777 |
| B  | 8.12828  | 0.328734 | 6.084    |
| O  | 11.37727 | 0.140499 | 6.189053 |
| C  | 10.43549 | 0.836874 | 6.34099  |
| Cu | 7.279841 | -0.88252 | 7.486118 |
| Mn | 7.226307 | -1.05984 | 5.068857 |

|   |          |          |          |   |          |          |          |
|---|----------|----------|----------|---|----------|----------|----------|
| O | 4.425984 | 0.64102  | 7.231789 | O | 4.627276 | -1.67192 | 6.254357 |
| C | 5.271975 | 0.09706  | 6.611148 | C | 5.707793 | -1.36496 | 5.882531 |
| O | 10.50001 | 1.971519 | 3.114644 | O | 9.962827 | 3.346053 | 4.265641 |
| C | 9.99461  | 1.703125 | 4.149592 | C | 9.331817 | 2.660167 | 5.004132 |
| O | 4.48735  | 0.685909 | 3.698146 | O | 5.15369  | -0.00408 | 3.282635 |
| C | 5.549819 | 0.555278 | 4.244665 | C | 6.139965 | 0.055021 | 3.955514 |
| C | 9.305363 | 3.109904 | 7.063585 | C | 7.739404 | 3.231547 | 7.616642 |
| H | 8.403212 | 3.698168 | 6.971198 | H | 6.801197 | 3.546748 | 7.190891 |
| C | 10.52216 | 3.295735 | 6.342184 | C | 9.010416 | 3.854757 | 7.429825 |
| H | 10.70788 | 4.055506 | 5.595579 | H | 9.201066 | 4.737495 | 6.840701 |
| C | 11.4578  | 2.317989 | 6.775939 | C | 9.984808 | 3.085232 | 8.111036 |
| H | 12.4702  | 2.195637 | 6.411052 | H | 11.04723 | 3.278631 | 8.13287  |
| C | 10.81029 | 1.510679 | 7.756414 | C | 9.317069 | 1.9684   | 8.710257 |
| H | 11.25523 | 0.67885  | 8.28129  | H | 9.784456 | 1.186987 | 9.290527 |
| C | 9.488954 | 2.009474 | 7.942731 | C | 7.927954 | 2.075954 | 8.411102 |
| H | 8.758126 | 1.637237 | 8.647668 | H | 7.149952 | 1.410691 | 8.728005 |
| C | 6.506463 | -2.75544 | 6.109488 | C | 8.148497 | -2.92318 | 5.314614 |
| H | 6.576248 | -3.12539 | 7.124395 | H | 8.131992 | -3.49474 | 6.229781 |
| C | 7.606807 | -2.49246 | 5.232612 | C | 9.136991 | -1.9597  | 4.951409 |
| H | 8.656991 | -2.58169 | 5.470802 | H | 9.989987 | -1.66984 | 5.535063 |
| C | 7.075367 | -2.11893 | 3.972126 | C | 8.794041 | -1.44388 | 3.673637 |
| H | 7.652751 | -1.83416 | 3.102214 | H | 9.316557 | -0.65675 | 3.153287 |
| C | 5.650535 | -2.16107 | 4.06161  | C | 7.593446 | -2.08353 | 3.243252 |
| H | 4.955847 | -1.91567 | 3.26983  | H | 7.056579 | -1.8783  | 2.33013  |
| C | 5.297851 | -2.5589  | 5.372456 | C | 7.200004 | -3.00288 | 4.247651 |
| H | 4.290171 | -2.67843 | 5.75109  | H | 6.312014 | -3.61752 | 4.230703 |
| C | 5.037344 | 3.78693  | 2.975689 | C | 4.878252 | 3.086241 | 3.092414 |
| H | 4.554601 | 2.825231 | 2.76887  | H | 4.661948 | 2.092595 | 2.692829 |
| C | 4.656216 | 4.124234 | 4.434976 | C | 4.36109  | 3.065943 | 4.531172 |
| H | 5.059108 | 5.103453 | 4.717981 | H | 4.518962 | 4.042621 | 4.99519  |
| H | 5.094351 | 3.390516 | 5.116739 | H | 4.934426 | 2.336591 | 5.106509 |
| C | 3.128751 | 4.149625 | 4.604973 | C | 2.876277 | 2.730722 | 4.542059 |
| H | 2.735926 | 3.137107 | 4.445557 | H | 2.746782 | 1.714438 | 4.154011 |
| H | 2.879271 | 4.420375 | 5.639854 | H | 2.494562 | 2.737162 | 5.567962 |
| C | 2.459491 | 5.124762 | 3.628263 | C | 2.083655 | 3.71108  | 3.684239 |
| H | 1.366757 | 5.0618   | 3.717534 | H | 1.023968 | 3.434601 | 3.668332 |
| H | 2.732048 | 6.156286 | 3.898228 | H | 2.146764 | 4.710438 | 4.1347   |
| C | 2.884535 | 4.855583 | 2.178703 | C | 2.630949 | 3.776486 | 2.262461 |
| H | 2.461438 | 5.619262 | 1.512041 | H | 2.078351 | 4.519555 | 1.676965 |
| H | 2.468572 | 3.892388 | 1.850594 | H | 2.482127 | 2.805272 | 1.775405 |
| C | 4.416647 | 4.822826 | 2.017604 | C | 4.120952 | 4.106785 | 2.257058 |

|   |          |          |          |   |          |          |          |
|---|----------|----------|----------|---|----------|----------|----------|
| H | 4.661409 | 4.602776 | 0.973522 | H | 4.500327 | 4.130114 | 1.23288  |
| H | 4.812176 | 5.822809 | 2.230852 | H | 4.265425 | 5.104077 | 2.679903 |
| C | 6.941911 | 2.692791 | 0.94908  | C | 7.123511 | 2.735106 | 1.259412 |
| H | 6.614138 | 3.550695 | 0.348023 | H | 6.642256 | 3.497929 | 0.639942 |
| C | 6.00719  | 1.50776  | 0.626435 | C | 6.62233  | 1.362666 | 0.827932 |
| H | 6.284821 | 0.654413 | 1.254344 | H | 7.062815 | 0.620364 | 1.495164 |
| H | 4.968186 | 1.743104 | 0.871199 | H | 5.542158 | 1.287973 | 0.950898 |
| C | 6.092596 | 1.100709 | -0.85423 | C | 7.014904 | 1.054485 | -0.61051 |
| H | 5.694598 | 1.912708 | -1.481   | H | 6.527793 | 1.771482 | -1.28368 |
| H | 5.441928 | 0.232924 | -1.02625 | H | 6.649456 | 0.05923  | -0.88626 |
| C | 7.527702 | 0.78273  | -1.28817 | C | 8.523393 | 1.138955 | -0.79746 |
| H | 7.869795 | -0.12658 | -0.77315 | H | 9.002736 | 0.363471 | -0.1869  |
| H | 7.562177 | 0.562747 | -2.36342 | H | 8.79408  | 0.941117 | -1.84    |
| C | 8.472923 | 1.939077 | -0.94862 | C | 9.041208 | 2.502726 | -0.36187 |
| H | 8.228357 | 2.807615 | -1.57845 | H | 8.631333 | 3.271427 | -1.0295  |
| H | 9.509776 | 1.667191 | -1.18739 | H | 10.13165 | 2.546979 | -0.45535 |
| C | 8.384727 | 2.335423 | 0.53281  | C | 8.637812 | 2.819281 | 1.072016 |
| H | 9.070929 | 3.16458  | 0.720045 | H | 9.009369 | 3.80441  | 1.352713 |
| H | 8.739721 | 1.505108 | 1.151292 | H | 9.103173 | 2.106327 | 1.758451 |
| C | 7.985785 | 4.784614 | 2.789243 | C | 7.359574 | 4.792582 | 3.243279 |
| H | 8.969727 | 4.299198 | 2.751923 | H | 8.434725 | 4.606683 | 3.263581 |
| C | 7.91558  | 5.779489 | 1.609486 | C | 7.095931 | 5.822679 | 2.151392 |
| H | 6.948747 | 6.293802 | 1.607541 | H | 6.034326 | 6.071509 | 2.115854 |
| H | 7.996262 | 5.264056 | 0.649469 | H | 7.366812 | 5.427085 | 1.171761 |
| C | 9.034657 | 6.83328  | 1.69886  | C | 7.901629 | 7.088411 | 2.433971 |
| H | 10.00864 | 6.339027 | 1.572136 | H | 8.97002  | 6.847102 | 2.377589 |
| H | 8.936319 | 7.53953  | 0.863533 | H | 7.700684 | 7.839642 | 1.662297 |
| C | 9.017683 | 7.585992 | 3.033916 | C | 7.591826 | 7.653995 | 3.8155   |
| H | 9.868101 | 8.277944 | 3.091116 | H | 8.206892 | 8.539283 | 4.008698 |
| H | 8.110336 | 8.205076 | 3.091916 | H | 6.543791 | 7.979573 | 3.841216 |
| C | 9.044813 | 6.611981 | 4.217482 | C | 7.812083 | 6.606588 | 4.900914 |
| H | 8.952062 | 7.161684 | 5.163764 | H | 7.548766 | 7.013193 | 5.883571 |
| H | 10.0209  | 6.108612 | 4.24543  | H | 8.874617 | 6.340403 | 4.932695 |
| C | 7.925165 | 5.56215  | 4.120479 | C | 7.00167  | 5.350201 | 4.614399 |
| H | 7.980911 | 4.869734 | 4.963363 | H | 7.184332 | 4.583846 | 5.364159 |
| H | 6.963632 | 6.080581 | 4.201837 | H | 5.936872 | 5.595432 | 4.642759 |
| C | 7.44114  | -1.04948 | 9.678276 | C | 7.215144 | -1.223   | 9.352335 |
| N | 6.379823 | -1.15109 | 10.55471 | N | 6.398575 | -0.69103 | 10.31478 |
| C | 6.782514 | -1.53851 | 11.82498 | C | 6.694081 | -1.19048 | 11.57466 |
| H | 6.081404 | -1.67977 | 12.63393 | H | 6.15059  | -0.89034 | 12.45505 |
| C | 8.125169 | -1.69834 | 11.77556 | C | 7.717582 | -2.07204 | 11.41039 |



|   |          |          |          |   |          |          |          |
|---|----------|----------|----------|---|----------|----------|----------|
| H | 8.826095 | -2.01966 | 12.53095 | H | 8.258239 | -2.67389 | 12.12169 |
| N | 8.516226 | -1.40592 | 10.47315 | N | 8.021979 | -2.0714  | 10.05561 |
| C | 4.976465 | -0.95756 | 10.26371 | C | 5.47309  | 0.34955  | 10.01802 |
| C | 4.236632 | -2.00159 | 9.709909 | C | 4.7336   | 0.271044 | 8.841409 |
| H | 4.728214 | -2.933   | 9.442366 | H | 4.745249 | -0.63341 | 8.25246  |
| C | 2.866673 | -1.84443 | 9.510408 | C | 4.004805 | 1.373257 | 8.418546 |
| H | 2.30054  | -2.66413 | 9.071713 | H | 3.462656 | 1.313273 | 7.480974 |
| C | 2.209756 | -0.65786 | 9.863685 | C | 3.977358 | 2.553477 | 9.168791 |
| C | 2.973372 | 0.368388 | 10.43683 | C | 4.672856 | 2.582429 | 10.38074 |
| H | 2.492992 | 1.302277 | 10.7219  | H | 4.662617 | 3.487077 | 10.98115 |
| C | 4.345002 | 0.227293 | 10.63879 | C | 5.42996  | 1.494305 | 10.80617 |
| H | 4.923516 | 1.036747 | 11.07712 | H | 6.03478  | 1.561503 | 11.7037  |
| C | 0.736195 | -0.47562 | 9.59432  | C | 3.250756 | 3.762113 | 8.658393 |
| H | 0.270654 | 0.187067 | 10.33036 | H | 3.159159 | 4.528175 | 9.431012 |
| H | 0.202597 | -1.43102 | 9.606188 | H | 2.250018 | 3.500073 | 8.303975 |
| H | 0.583201 | -0.02607 | 8.604296 | H | 3.78927  | 4.196552 | 7.80912  |
| C | 9.899915 | -1.5294  | 10.0903  | C | 9.083616 | -2.79838 | 9.445588 |
| C | 10.28308 | -2.35805 | 9.034553 | C | 9.273123 | -4.14462 | 9.746444 |
| H | 9.530149 | -2.87446 | 8.447916 | H | 8.609483 | -4.64271 | 10.44536 |
| C | 11.63484 | -2.52185 | 8.741994 | C | 10.294   | -4.84643 | 9.114581 |
| H | 11.91502 | -3.15635 | 7.904189 | H | 10.43307 | -5.90013 | 9.34009  |
| C | 12.63245 | -1.88677 | 9.496861 | C | 11.13107 | -4.22404 | 8.181324 |
| C | 12.22416 | -1.06464 | 10.55508 | C | 10.923   | -2.87116 | 7.904522 |
| H | 12.96916 | -0.54459 | 11.15439 | H | 11.56392 | -2.35884 | 7.196799 |
| C | 10.87433 | -0.87878 | 10.85088 | C | 9.90898  | -2.15335 | 8.528969 |
| H | 10.58189 | -0.21728 | 11.66266 | H | 9.757121 | -1.10612 | 8.300864 |
| C | 14.09312 | -2.08338 | 9.171162 | C | 12.22027 | -4.99607 | 7.496837 |
| H | 14.40424 | -3.11714 | 9.367808 | H | 12.94701 | -5.37492 | 8.223505 |
| H | 14.72984 | -1.42409 | 9.76802  | H | 12.7505  | -4.37236 | 6.774844 |
| H | 14.29191 | -1.88252 | 8.112331 | H | 11.80915 | -5.8619  | 6.967281 |

$\{(\text{CO})_2\text{CpMn}\}_2\text{B}\{\text{Cu}(\text{IMe})\}\{\text{Pt}(\text{PCy}_3)\}$   
without dispersion

|    |          |          |          |
|----|----------|----------|----------|
| Mn | 6.159797 | 5.970676 | 6.99574  |
| Mn | 6.479844 | 8.27701  | 3.933296 |
| B  | 6.676617 | 6.879546 | 5.348187 |
| O  | 7.503287 | 3.331486 | 7.245825 |
| C  | 7.217832 | 4.454655 | 6.953754 |
| O  | 4.049808 | 4.72665  | 5.39964  |
| C  | 4.939845 | 5.21273  | 6.006055 |

$\{(\text{CO})_2\text{CpMn}\}_2\text{B}\{\text{Cu}(\text{IMe})\}\{\text{Pt}(\text{PCy}_3)\}$   
without dispersion

|    |          |          |          |
|----|----------|----------|----------|
| Mn | 6.031203 | 5.869388 | 6.79264  |
| Mn | 6.926799 | 8.275812 | 4.025692 |
| B  | 6.872041 | 6.855541 | 5.36074  |
| O  | 7.283299 | 3.241026 | 7.347481 |
| C  | 6.995769 | 4.338905 | 6.975803 |
| O  | 4.276722 | 4.863038 | 4.682668 |
| C  | 5.012149 | 5.238089 | 5.529358 |

|    |          |          |          |    |          |          |          |
|----|----------|----------|----------|----|----------|----------|----------|
| O  | 8.867432 | 8.122442 | 2.224085 | O  | 9.299553 | 7.980039 | 2.315969 |
| C  | 7.919655 | 8.072953 | 2.931212 | C  | 8.382452 | 8.015539 | 3.064331 |
| O  | 8.081735 | 9.740849 | 5.895353 | O  | 8.197353 | 9.563702 | 6.320414 |
| C  | 7.457629 | 9.110336 | 5.124103 | C  | 7.740197 | 9.015075 | 5.384715 |
| C  | 6.54784  | 6.107317 | 9.151655 | C  | 6.151588 | 6.049058 | 8.917999 |
| H  | 7.236812 | 5.45845  | 9.678412 | H  | 6.742958 | 5.381227 | 9.527733 |
| C  | 6.869387 | 7.360969 | 8.558034 | C  | 6.611273 | 7.257294 | 8.326605 |
| H  | 7.838122 | 7.842277 | 8.559888 | H  | 7.602256 | 7.675349 | 8.402815 |
| C  | 5.690904 | 7.872898 | 7.94484  | C  | 5.547206 | 7.795362 | 7.550145 |
| H  | 5.604611 | 8.821397 | 7.43586  | H  | 5.588642 | 8.704521 | 6.976819 |
| C  | 4.64472  | 6.930101 | 8.156951 | C  | 4.434696 | 6.916745 | 7.665346 |
| H  | 3.617249 | 7.030859 | 7.828232 | H  | 3.474026 | 7.039537 | 7.185834 |
| C  | 5.174351 | 5.833268 | 8.91081  | C  | 4.804684 | 5.83192  | 8.517983 |
| H  | 4.62975  | 4.952981 | 9.229402 | H  | 4.185985 | 4.987891 | 8.785148 |
| C  | 4.593645 | 7.783927 | 2.927926 | C  | 5.14893  | 7.729442 | 2.952328 |
| H  | 4.303946 | 6.80636  | 2.566302 | H  | 4.904983 | 6.728841 | 2.633078 |
| C  | 5.27797  | 8.794159 | 2.187515 | C  | 5.874171 | 8.712865 | 2.218177 |
| H  | 5.63194  | 8.70629  | 1.167425 | H  | 6.304849 | 8.578979 | 1.237001 |
| C  | 5.431007 | 9.937159 | 3.019187 | C  | 5.974325 | 9.888857 | 3.010831 |
| H  | 5.917442 | 10.86641 | 2.749048 | H  | 6.485933 | 10.80054 | 2.73926  |
| C  | 4.838251 | 9.629225 | 4.282162 | C  | 5.315483 | 9.624858 | 4.245942 |
| H  | 4.785865 | 10.29703 | 5.133612 | H  | 5.2333   | 10.3132  | 5.074791 |
| C  | 4.317995 | 8.305861 | 4.224107 | C  | 4.803738 | 8.298258 | 4.20803  |
| H  | 3.801285 | 7.785407 | 5.016601 | H  | 4.279518 | 7.790124 | 4.998052 |
| Pt | 8.447159 | 5.698677 | 5.809988 | Pt | 8.424318 | 5.555958 | 5.948004 |
| P  | 10.74388 | 5.197049 | 5.595271 | P  | 10.64419 | 5.240117 | 5.549882 |
| C  | 11.95926 | 6.648804 | 5.322642 | C  | 11.67617 | 6.7583   | 5.283414 |
| H  | 12.78736 | 6.413638 | 6.002516 | H  | 12.52256 | 6.654773 | 5.968501 |
| C  | 11.33721 | 7.983786 | 5.780571 | C  | 10.85508 | 7.974633 | 5.699109 |
| H  | 10.51395 | 8.240732 | 5.108059 | H  | 9.999822 | 8.038278 | 5.030363 |
| H  | 10.89447 | 7.891977 | 6.774974 | H  | 10.44228 | 7.835415 | 6.69771  |
| C  | 12.36724 | 9.123489 | 5.779206 | C  | 11.67114 | 9.256482 | 5.619904 |
| H  | 13.13354 | 8.928053 | 6.544279 | H  | 12.48834 | 9.213704 | 6.352327 |
| H  | 11.87032 | 10.05739 | 6.070789 | H  | 11.0382  | 10.10634 | 5.889894 |
| C  | 13.04119 | 9.285823 | 4.412996 | C  | 12.25728 | 9.445366 | 4.225845 |
| H  | 12.30142 | 9.648898 | 3.685804 | H  | 11.4381  | 9.57625  | 3.510219 |
| H  | 13.82868 | 10.04915 | 4.463484 | H  | 12.87293 | 10.35039 | 4.187833 |
| C  | 13.62359 | 7.957385 | 3.919821 | C  | 13.07956 | 8.228488 | 3.815905 |
| H  | 14.47245 | 7.669523 | 4.557707 | H  | 13.9438  | 8.130215 | 4.485789 |
| H  | 14.02668 | 8.072315 | 2.904774 | H  | 13.47162 | 8.357372 | 2.800977 |
| C  | 12.5798  | 6.826774 | 3.923527 | C  | 12.23832 | 6.956441 | 3.879956 |

|    |          |          |          |    |          |          |          |
|----|----------|----------|----------|----|----------|----------|----------|
| H  | 11.79613 | 7.071583 | 3.197571 | H  | 11.41259 | 7.062678 | 3.179029 |
| H  | 13.06089 | 5.904334 | 3.584709 | H  | 12.83054 | 6.090528 | 3.574636 |
| C  | 11.24015 | 3.827972 | 4.375743 | C  | 11.04741 | 3.987154 | 4.259259 |
| H  | 12.33849 | 3.817749 | 4.355038 | H  | 12.13231 | 3.947023 | 4.120761 |
| C  | 10.72575 | 4.107048 | 2.948667 | C  | 10.36326 | 4.367349 | 2.949139 |
| H  | 11.0623  | 5.079608 | 2.587724 | H  | 10.72424 | 5.323633 | 2.581522 |
| H  | 9.632729 | 4.15486  | 2.978095 | H  | 9.300305 | 4.501506 | 3.167259 |
| C  | 11.16809 | 3.02149  | 1.955135 | C  | 10.52168 | 3.297814 | 1.878252 |
| H  | 10.75678 | 3.248529 | 0.962497 | H  | 9.988088 | 3.609289 | 0.974264 |
| H  | 12.26236 | 3.047678 | 1.84563  | H  | 11.58114 | 3.198695 | 1.608945 |
| C  | 10.73532 | 1.621236 | 2.399621 | C  | 9.99585  | 1.955077 | 2.365028 |
| H  | 11.13584 | 0.861389 | 1.715602 | H  | 10.14236 | 1.183339 | 1.601739 |
| H  | 9.640692 | 1.545771 | 2.341412 | H  | 8.920725 | 2.042549 | 2.533614 |
| C  | 11.18761 | 1.333789 | 3.834217 | C  | 10.68146 | 1.552788 | 3.664079 |
| H  | 12.28322 | 1.238665 | 3.856832 | H  | 11.748   | 1.383457 | 3.468853 |
| H  | 10.78976 | 0.367774 | 4.172506 | H  | 10.27232 | 0.60721  | 4.037652 |
| C  | 10.75417 | 2.430977 | 4.820379 | C  | 10.53524 | 2.626948 | 4.73646  |
| H  | 9.661291 | 2.440669 | 4.905319 | H  | 9.482883 | 2.744164 | 5.009458 |
| H  | 11.13447 | 2.173486 | 5.811134 | H  | 11.06256 | 2.31484  | 5.638263 |
| C  | 11.32751 | 4.499085 | 7.268569 | C  | 11.34931 | 4.545692 | 7.108262 |
| H  | 10.65964 | 3.636735 | 7.388486 | H  | 10.74239 | 3.655193 | 7.297562 |
| C  | 12.78274 | 3.993768 | 7.35263  | C  | 12.81608 | 4.139272 | 7.033031 |
| H  | 13.4793  | 4.835016 | 7.245961 | H  | 13.4258  | 5.017992 | 6.800764 |
| H  | 13.01375 | 3.298083 | 6.541024 | H  | 12.97271 | 3.420601 | 6.225833 |
| C  | 13.05818 | 3.300982 | 8.69934  | C  | 13.28418 | 3.548625 | 8.361006 |
| H  | 12.46137 | 2.379667 | 8.760054 | H  | 12.73952 | 2.614238 | 8.546289 |
| H  | 14.11063 | 2.990076 | 8.740065 | H  | 14.34815 | 3.294703 | 8.299945 |
| C  | 12.72445 | 4.201023 | 9.893809 | C  | 13.03047 | 4.508687 | 9.51851  |
| H  | 12.85947 | 3.648272 | 10.83256 | H  | 13.34736 | 4.055077 | 10.46334 |
| H  | 13.43416 | 5.040884 | 9.925009 | H  | 13.63845 | 5.411596 | 9.375841 |
| C  | 11.29608 | 4.748307 | 9.799169 | C  | 11.56022 | 4.90673  | 9.584827 |
| H  | 11.10705 | 5.455419 | 10.61759 | H  | 11.39348 | 5.618492 | 10.40054 |
| H  | 10.57873 | 3.925517 | 9.92821  | H  | 10.95312 | 4.018958 | 9.800854 |
| C  | 11.03305 | 5.441745 | 8.453491 | C  | 11.10008 | 5.512604 | 8.265359 |
| H  | 9.996391 | 5.786037 | 8.405871 | H  | 10.03665 | 5.767474 | 8.294321 |
| H  | 11.6677  | 6.33418  | 8.389636 | H  | 11.64975 | 6.441399 | 8.086779 |
| Cu | 7.063243 | 5.875888 | 3.437445 | Cu | 7.375975 | 5.886192 | 3.567193 |
| C  | 6.831644 | 4.42796  | 2.145261 | C  | 6.959173 | 4.441965 | 2.417343 |
| N  | 6.388015 | 3.144765 | 2.365682 | N  | 6.585005 | 3.175645 | 2.769968 |
| C  | 6.202401 | 2.45144  | 1.177043 | C  | 6.203124 | 2.42528  | 1.667005 |
| C  | 6.545957 | 3.297427 | 0.172234 | C  | 6.349616 | 3.227308 | 0.579471 |

|   |          |          |          |   |          |          |          |
|---|----------|----------|----------|---|----------|----------|----------|
| N | 6.930955 | 4.490607 | 0.771384 | N | 6.813883 | 4.449999 | 1.054979 |
| C | 7.366944 | 5.660281 | 0.008556 | C | 7.116272 | 5.610234 | 0.22924  |
| C | 6.127446 | 2.557939 | 3.682968 | C | 6.62037  | 2.687355 | 4.142048 |
| H | 7.872308 | 6.354577 | 0.674284 | H | 7.598277 | 6.348643 | 0.865567 |
| H | 6.507087 | 6.156216 | -0.45423 | H | 6.196392 | 6.026212 | -0.19073 |
| H | 8.062711 | 5.344931 | -0.77395 | H | 7.792545 | 5.322741 | -0.57875 |
| H | 6.557223 | 3.150979 | -0.89797 | H | 6.171881 | 3.041326 | -0.46757 |
| H | 5.856644 | 1.428611 | 1.147812 | H | 5.87464  | 1.402472 | 1.753672 |
| H | 6.508212 | 1.533619 | 3.701289 | H | 7.14409  | 1.731759 | 4.175263 |
| H | 5.056259 | 2.559201 | 3.896762 | H | 5.610487 | 2.586409 | 4.535896 |
| H | 6.64324  | 3.145619 | 4.437165 | H | 7.163439 | 3.42585  | 4.725542 |

**Table S7.** Optimized structures used for thermochemical calculations. For the methods employed see the **Computational Details**. Columns are multi-page.

| [[{(CO) <sub>2</sub> CpMn} <sub>2</sub> B{Au(DMS)}}] |          |          |          | [[{(CO) <sub>2</sub> CpMn} <sub>2</sub> BAu] |          |          |          |
|------------------------------------------------------|----------|----------|----------|----------------------------------------------|----------|----------|----------|
| Au                                                   | 1.310159 | 0.404629 | 0.015781 | Au                                           | 0.697373 | -1.64932 | 0.232982 |
| Mn                                                   | -1.39012 | -1.8947  | 0.175498 | Mn                                           | -2.19912 | 0.4204   | 0.123489 |
| Mn                                                   | -0.85343 | 1.861174 | -0.19675 | Mn                                           | 1.638314 | 0.698406 | -0.25715 |
| B                                                    | -0.85278 | -0.12673 | -0.0041  | B                                            | -0.37321 | 0.256609 | -0.03355 |
| O                                                    | 0.187027 | -2.12518 | 2.636472 | O                                            | -1.84157 | 0.196267 | 3.025933 |
| C                                                    | -0.44671 | -2.02368 | 1.667473 | C                                            | -1.98528 | 0.287482 | 1.880287 |
| O                                                    | -3.73551 | -0.81656 | 1.553252 | O                                            | -1.78712 | 3.318419 | 0.155053 |
| C                                                    | -2.80114 | -1.25173 | 1.02108  | C                                            | -1.95934 | 2.172563 | 0.151649 |
| O                                                    | -2.65761 | 0.975282 | -2.32181 | O                                            | 0.334679 | 1.747112 | -2.66297 |
| C                                                    | -1.92438 | 1.290046 | -1.48856 | C                                            | 0.80496  | 1.302281 | -1.71312 |
| O                                                    | 0.945982 | 2.943533 | -2.27709 | O                                            | 3.380793 | -0.89185 | -2.06241 |
| C                                                    | 0.290314 | 2.466237 | -1.45812 | C                                            | 2.677847 | -0.32406 | -1.35808 |
| C                                                    | -0.96511 | -2.23425 | -1.93643 | C                                            | -2.53224 | -0.84163 | -1.62616 |
| H                                                    | -0.54772 | -1.49612 | -2.60328 | H                                            | -1.75424 | -1.18207 | -2.29141 |
| C                                                    | -0.23149 | -3.17992 | -1.16736 | C                                            | -3.01122 | -1.52882 | -0.47459 |
| H                                                    | 0.841774 | -3.28671 | -1.14767 | H                                            | -2.66115 | -2.48109 | -0.10773 |
| C                                                    | -1.16891 | -3.99952 | -0.46665 | C                                            | -4.06797 | -0.75136 | 0.087373 |
| H                                                    | -0.9261  | -4.80467 | 0.209624 | H                                            | -4.63033 | -0.99899 | 0.974677 |
| C                                                    | -2.46942 | -3.55609 | -0.79772 | C                                            | -4.24386 | 0.403188 | -0.71071 |
| H                                                    | -3.39308 | -3.96138 | -0.41424 | H                                            | -4.95827 | 1.192931 | -0.53776 |
| C                                                    | -2.3499  | -2.45824 | -1.70383 | C                                            | -3.28291 | 0.356801 | -1.76705 |
| H                                                    | -3.16183 | -1.90132 | -2.14399 | H                                            | -3.16054 | 1.092707 | -2.54655 |
| C                                                    | -0.35394 | 2.758278 | 1.758848 | C                                            | 2.423855 | 0.869905 | 1.809074 |
| C                                                    | -1.47947 | 1.892422 | 1.888624 | C                                            | 1.324256 | 1.755479 | 1.618725 |
| C                                                    | -2.51924 | 2.39785  | 1.06276  | C                                            | 1.674632 | 2.671218 | 0.584724 |
| C                                                    | -2.03457 | 3.569473 | 0.407308 | C                                            | 2.976915 | 2.335434 | 0.118085 |

|   |          |          |          |
|---|----------|----------|----------|
| C | -0.70148 | 3.790258 | 0.848953 |
| H | 0.590585 | 2.651829 | 2.267571 |
| H | -1.5439  | 1.026627 | 2.527491 |
| H | -3.49924 | 1.960213 | 0.953927 |
| H | -2.58694 | 4.187954 | -0.28261 |
| H | -0.05567 | 4.59436  | 0.530008 |
| S | 3.640085 | -0.40889 | 0.391438 |
| C | 4.28934  | -0.86756 | -1.25571 |
| H | 5.267249 | -1.33489 | -1.13613 |
| H | 3.602199 | -1.53929 | -1.76807 |
| H | 4.393312 | 0.055196 | -1.82484 |
| C | 3.448155 | -2.06083 | 1.153671 |
| H | 4.436203 | -2.48648 | 1.330828 |
| H | 2.925568 | -1.91984 | 2.098431 |
| H | 2.854729 | -2.71019 | 0.512314 |

|   |          |          |          |
|---|----------|----------|----------|
| C | 3.43639  | 1.222807 | 0.885434 |
| H | 2.465374 | 0.05866  | 2.518211 |
| H | 0.416087 | 1.767694 | 2.19858  |
| H | 1.049876 | 3.471894 | 0.219918 |
| H | 3.52766  | 2.84689  | -0.65564 |
| H | 4.388756 | 0.727106 | 0.772739 |

[[{(CO)<sub>2</sub>CpMn<sub>2</sub>B{Cu(DMS)}}]

|    |          |          |          |
|----|----------|----------|----------|
| Mn | -2.03727 | 0.414627 | 0.193204 |
| Mn | 1.673493 | 1.153044 | -0.15148 |
| B  | -0.19549 | 0.850112 | 0.029993 |
| O  | -2.12076 | -1.98538 | 1.90811  |
| C  | -1.98482 | -1.06517 | 1.206433 |
| O  | -1.80232 | 2.112914 | 2.574148 |
| C  | -1.89227 | 1.432536 | 1.640392 |
| O  | 0.752321 | 2.974405 | -2.25896 |
| C  | 1.115625 | 2.244446 | -1.43579 |
| O  | 2.542813 | -0.78609 | -2.20095 |
| C  | 2.118736 | -0.08445 | -1.37316 |
| C  | -2.33527 | 1.228914 | -1.80944 |
| H  | -1.58273 | 1.729482 | -2.39801 |
| C  | -2.64293 | -0.16062 | -1.84072 |
| H  | -2.15734 | -0.90504 | -2.45262 |
| C  | -3.73177 | -0.38657 | -0.94946 |
| H  | -4.19414 | -1.34112 | -0.74736 |
| C  | -4.10149 | 0.85368  | -0.37212 |
| H  | -4.89167 | 1.011998 | 0.345369 |
| C  | -3.23288 | 1.853842 | -0.90096 |
| H  | -3.25731 | 2.906275 | -0.66251 |
| C  | 2.565741 | 0.545951 | 1.76311  |
| C  | 1.727458 | 1.678229 | 1.966312 |
| C  | 2.250424 | 2.751318 | 1.194804 |
| C  | 3.416789 | 2.286551 | 0.516691 |
| C  | 3.606347 | 0.927251 | 0.866082 |

[[{(CO)<sub>2</sub>CpMn<sub>2</sub>BCu]

|    |          |          |          |
|----|----------|----------|----------|
| Mn | -1.89094 | 0.187028 | 0.194542 |
| Mn | 1.891049 | 0.187011 | -0.1946  |
| B  | 0.000052 | 0.42345  | -7.8E-05 |
| O  | -2.37136 | -2.51904 | 1.314895 |
| C  | -2.05004 | -1.49698 | 0.84827  |
| O  | -1.44546 | 1.304423 | 2.876125 |
| C  | -1.61917 | 0.845358 | 1.828788 |
| O  | 1.445467 | 1.305646 | -2.87565 |
| C  | 1.619233 | 0.846069 | -1.82854 |
| O  | 2.371213 | -2.51862 | -1.31606 |
| C  | 2.050091 | -1.49672 | -0.84898 |
| C  | -2.08899 | 1.231911 | -1.70515 |
| H  | -1.27238 | 1.572703 | -2.32262 |
| C  | -2.74982 | -0.02138 | -1.81317 |
| H  | -2.50769 | -0.80793 | -2.51112 |
| C  | -3.80374 | -0.04795 | -0.85131 |
| H  | -4.48645 | -0.86735 | -0.68463 |
| C  | -3.79593 | 1.183301 | -0.15287 |
| H  | -4.46924 | 1.467802 | 0.641034 |
| C  | -2.73155 | 1.977157 | -0.67471 |
| H  | -2.46923 | 2.97453  | -0.35687 |
| C  | 2.749747 | -0.02209 | 1.813123 |
| C  | 2.088757 | 1.231158 | 1.705592 |
| C  | 2.731269 | 1.976944 | 0.675539 |
| C  | 3.795827 | 1.183476 | 0.153456 |
| C  | 3.803783 | -0.04806 | 0.851377 |

|    |          |          |          |
|----|----------|----------|----------|
| H  | 2.451765 | -0.41881 | 2.232698 |
| H  | 0.869437 | 1.729278 | 2.617964 |
| H  | 1.839633 | 3.747978 | 1.141751 |
| H  | 4.038359 | 2.865267 | -0.14891 |
| H  | 4.4012   | 0.288588 | 0.511003 |
| Cu | 0.178625 | -1.10397 | -0.11544 |
| S  | 0.517704 | -3.36462 | -0.43324 |
| C  | 0.143258 | -4.2519  | 1.122068 |
| H  | 0.297003 | -5.31949 | 0.963494 |
| H  | 0.77717  | -3.89218 | 1.932213 |
| H  | -0.89836 | -4.05448 | 1.366002 |
| C  | 2.307572 | -3.71143 | -0.5813  |
| H  | 2.841104 | -3.36451 | 0.303506 |
| H  | 2.450271 | -4.78391 | -0.7166  |
| H  | 2.66456  | -3.1747  | -1.45803 |

|    |          |          |          |
|----|----------|----------|----------|
| H  | 2.507767 | -0.80891 | 2.51081  |
| H  | 1.271949 | 1.571495 | 2.323039 |
| H  | 2.468864 | 2.974436 | 0.358149 |
| H  | 4.469217 | 1.468448 | -0.64021 |
| H  | 4.486606 | -0.8673  | 0.684389 |
| Cu | 0.000066 | -1.54409 | -0.00011 |

[[{(CO)<sub>2</sub>CpMn]<sub>2</sub>BCu]<sub>2</sub>

|    |          |          |          |
|----|----------|----------|----------|
| Cu | -0.02108 | -1.25342 | -0.16194 |
| O  | 0.02318  | 2.507538 | -2.6709  |
| C  | 0.843999 | 2.052551 | -1.98758 |
| Mn | 2.313749 | 1.483257 | -1.10499 |
| B  | 1.880055 | -0.11265 | -0.0755  |
| Cu | 0.08203  | 1.255015 | 0.022697 |
| O  | 2.803881 | -0.51014 | -3.20875 |
| C  | 2.580211 | 0.250525 | -2.37372 |
| Mn | 2.146958 | -1.71739 | 1.015725 |
| B  | -1.82891 | 0.09286  | 0.004424 |
| Mn | -2.12593 | 1.652499 | 1.168141 |
| O  | 4.610758 | -1.80128 | -0.57272 |
| C  | 3.617836 | -1.76559 | 0.015231 |
| C  | -0.98922 | -1.73572 | -2.26851 |
| O  | -0.25195 | -1.99014 | -3.12055 |
| C  | -2.45418 | 0.338653 | 2.313983 |
| O  | -2.68193 | -0.50296 | 3.077564 |
| C  | -0.61587 | 2.039829 | 2.058251 |
| O  | 0.241661 | 2.392771 | 2.762693 |
| Mn | -2.33615 | -1.43119 | -1.10097 |
| O  | 1.118192 | -4.06209 | -0.45934 |
| C  | 1.456263 | -3.08251 | 0.060111 |
| C  | -2.87966 | -0.1048  | -2.15255 |
| O  | -3.28168 | 0.720381 | -2.85458 |
| C  | 3.030887 | 3.560268 | -1.0259  |
| H  | 2.50131  | 4.393384 | -1.46345 |

[[{(CO)<sub>2</sub>CpMn]<sub>2</sub>BAu]<sub>2</sub>

|    |          |          |          |
|----|----------|----------|----------|
| Au | 0.005918 | -1.44773 | -0.01653 |
| O  | 4.655676 | -1.75058 | 0.605636 |
| C  | 3.741195 | -1.64214 | -0.08997 |
| B  | 1.958012 | 0.000036 | 0.000006 |
| O  | 1.601178 | -4.219   | -0.34094 |
| Mn | -2.37033 | -1.48084 | 1.229949 |
| B  | -1.81966 | 0        | 0.000006 |
| C  | 1.810075 | -3.11587 | -0.61831 |
| Mn | 2.383232 | -1.50545 | -1.21643 |
| C  | -1.02385 | -1.97941 | 2.314519 |
| O  | -0.28188 | -2.3451  | 3.120283 |
| O  | -2.70711 | 0.875829 | 2.923718 |
| C  | -2.56018 | -0.04083 | 2.233061 |
| C  | 1.378646 | -1.01797 | -3.11914 |
| H  | 0.317734 | -0.88743 | -3.25536 |
| C  | 2.093156 | -2.23667 | -3.26471 |
| H  | 1.6604   | -3.19582 | -3.50582 |
| C  | 3.470586 | -1.98135 | -3.0266  |
| H  | 4.267974 | -2.70716 | -3.06315 |
| C  | 3.609377 | -0.59353 | -2.73032 |
| H  | 4.52964  | -0.07701 | -2.50839 |
| C  | 2.317279 | 0.000493 | -2.78294 |
| H  | 2.091447 | 1.046207 | -2.65135 |
| C  | -3.1938  | -2.86557 | -0.28102 |
| H  | -2.75295 | -3.03913 | -1.24893 |
| C  | -4.16028 | -1.86853 | 0.02411  |

|   |          |          |          |    |          |          |          |
|---|----------|----------|----------|----|----------|----------|----------|
| C | 2.868022 | 3.075685 | 0.302494 | H  | -4.59719 | -1.17757 | -0.67654 |
| H | 2.225107 | 3.491756 | 1.062406 | C  | -4.47434 | -1.97156 | 1.409083 |
| C | 4.433112 | 1.759149 | -0.75861 | H  | -5.18437 | -1.36232 | 1.947586 |
| H | 5.161999 | 0.987621 | -0.95356 | C  | -3.70925 | -3.03292 | 1.959792 |
| C | 3.742552 | 1.963018 | 0.465083 | H  | -3.72089 | -3.359   | 2.988202 |
| H | 3.878721 | 1.394003 | 1.369726 | C  | -2.91138 | -3.58064 | 0.911822 |
| C | 1.013679 | -1.49699 | 2.896873 | H  | -2.20768 | -4.39316 | 1.008701 |
| H | -0.04193 | -1.30065 | 2.996719 | Au | 0.00588  | 1.44776  | 0.01655  |
| C | 3.988834 | 2.750162 | -1.68481 | O  | 4.655573 | 1.750254 | -0.60581 |
| H | 4.322422 | 2.861143 | -2.70501 | C  | 3.741166 | 1.642245 | 0.089955 |
| C | 3.030223 | -2.60758 | 2.799998 | O  | 1.601196 | 4.21902  | 0.340724 |
| H | 3.769243 | -3.39302 | 2.766005 | Mn | -2.37037 | 1.480816 | -1.22995 |
| C | 3.290679 | -1.20465 | 2.781951 | C  | 1.809999 | 3.11593  | 0.618331 |
| H | 4.268416 | -0.74803 | 2.746113 | Mn | 2.383215 | 1.50553  | 1.216435 |
| C | 2.048292 | -0.51958 | 2.842884 | C  | -1.02391 | 1.979399 | -2.31453 |
| H | 1.906522 | 0.548237 | 2.884692 | O  | -0.28228 | 2.345067 | -3.12062 |
| C | -2.93849 | 2.889283 | -0.45692 | O  | -2.70728 | -0.87624 | -2.92316 |
| H | -2.62507 | 2.833884 | -1.48689 | C  | -2.56019 | 0.040779 | -2.23302 |
| C | -2.38901 | 3.735577 | 0.540689 | C  | 1.37866  | 1.01803  | 3.119153 |
| H | -1.57689 | 4.432594 | 0.399734 | H  | 0.317752 | 0.887456 | 3.255384 |
| C | -3.10197 | 3.517794 | 1.757151 | C  | 2.093137 | 2.236751 | 3.264713 |
| H | -2.91932 | 4.011204 | 2.699381 | H  | 1.660359 | 3.195893 | 3.505823 |
| C | -4.08666 | 2.530075 | 1.506984 | C  | 3.470573 | 1.981464 | 3.0266   |
| H | -4.7916  | 2.144616 | 2.228225 | H  | 4.267941 | 2.7073   | 3.063138 |
| C | -3.99061 | 2.139608 | 0.140925 | C  | 3.609397 | 0.593654 | 2.730322 |
| H | -4.62222 | 1.425105 | -0.36119 | H  | 4.52967  | 0.077155 | 2.50838  |
| C | -4.32588 | -2.30836 | -1.16654 | C  | 2.317316 | -0.00041 | 2.782948 |
| H | -5.13291 | -1.90153 | -1.75727 | H  | 2.091509 | -1.04613 | 2.651352 |
| C | -4.02223 | -1.96447 | 0.181871 | C  | -3.19388 | 2.865551 | 0.280998 |
| H | -4.56789 | -1.27175 | 0.802002 | H  | -2.75303 | 3.039137 | 1.248903 |
| C | -2.89258 | -2.73206 | 0.581176 | C  | -4.16033 | 1.868473 | -0.02411 |
| H | -2.43918 | -2.71717 | 1.559042 | H  | -4.59721 | 1.177519 | 0.676559 |
| C | -2.49938 | -3.54069 | -0.5189  | C  | -4.4744  | 1.971475 | -1.40908 |
| H | -1.66949 | -4.23089 | -0.53531 | H  | -5.18441 | 1.362204 | -1.94758 |
| C | -3.39224 | -3.28342 | -1.59932 | C  | -3.70934 | 3.032846 | -1.95981 |
| H | -3.3558  | -3.74077 | -2.57606 | H  | -3.72099 | 3.358911 | -2.98823 |
| C | 1.625885 | -2.781   | 2.872112 | C  | -2.91148 | 3.580602 | -0.91186 |
| H | 1.107418 | -3.7278  | 2.896883 | H  | -2.2078  | 4.393141 | -1.00876 |

[[{(CO)<sub>2</sub>CpMn<sub>2</sub>B{Cu(I Me)}}]

|    |          |          |          |
|----|----------|----------|----------|
| Mn | 1.127906 | -1.88531 | -0.23013 |
| Mn | 1.127495 | 1.885727 | 0.229984 |
| B  | 1.141249 | 0.000241 | -0.00011 |

[[{(CO)<sub>2</sub>CpMn<sub>2</sub>B{Au(I Me)}}]

|    |          |          |          |
|----|----------|----------|----------|
| Au | -1.0216  | -0.42012 | 0.006794 |
| Mn | 1.61275  | 1.963204 | 0.041152 |
| Mn | 1.255705 | -1.8104  | -0.09095 |

|    |          |          |          |   |          |          |          |
|----|----------|----------|----------|---|----------|----------|----------|
| O  | -1.15163 | -2.43392 | -2.02446 | B | 1.169991 | 0.158705 | -0.02803 |
| C  | -0.30261 | -2.123   | -1.29092 | O | 0.390114 | 2.095362 | 2.698847 |
| O  | 2.812914 | -1.185   | -2.52675 | C | 0.884178 | 2.040948 | 1.645443 |
| C  | 2.134831 | -1.45908 | -1.6262  | O | 4.186181 | 1.062852 | 1.102689 |
| O  | 2.816413 | 1.185553 | 2.523748 | C | 3.163408 | 1.425836 | 0.692276 |
| C  | 2.136765 | 1.459555 | 1.624356 | O | 2.982274 | -1.0383  | -2.32246 |
| O  | -1.15009 | 2.431328 | 2.027659 | C | 2.283141 | -1.31506 | -1.44647 |
| C  | -0.30167 | 2.121779 | 1.292862 | O | -0.59244 | -3.02513 | -2.04243 |
| C  | 1.642718 | -2.09625 | 1.878994 | C | 0.084024 | -2.49159 | -1.26883 |
| H  | 1.695104 | -1.28675 | 2.589586 | C | 0.928862 | 2.216231 | -2.01572 |
| C  | 0.508708 | -2.91012 | 1.607791 | H | 0.520284 | 1.422806 | -2.62175 |
| H  | -0.4648  | -2.81965 | 2.06425  | C | 0.188849 | 3.097761 | -1.17844 |
| C  | 0.890728 | -3.89026 | 0.643679 | H | -0.87974 | 3.085751 | -1.03208 |
| H  | 0.248705 | -4.6515  | 0.226858 | C | 1.109003 | 4.019556 | -0.59213 |
| C  | 2.250945 | -3.67995 | 0.317348 | H | 0.860546 | 4.808124 | 0.101489 |
| H  | 2.830262 | -4.25342 | -0.38999 | C | 2.405312 | 3.704521 | -1.06028 |
| C  | 2.720342 | -2.56821 | 1.079815 | H | -3.31914 | 4.207853 | -0.78465 |
| H  | 3.719313 | -2.16054 | 1.063312 | C | 2.300226 | 2.581666 | -1.93799 |
| C  | 0.506231 | 2.90847  | -1.60849 | H | 3.11374  | 2.099562 | -2.4571  |
| C  | 1.642383 | 2.097326 | -1.87907 | C | 0.781329 | -2.61081 | 1.906324 |
| C  | 2.718532 | 2.572224 | -1.07969 | C | 1.858486 | -1.68134 | 1.998265 |
| C  | 2.246154 | 3.683067 | -0.31773 | C | 2.936685 | -2.17867 | 1.218279 |
| C  | 0.885499 | 3.889817 | -0.64455 | C | 2.525708 | -3.41456 | 0.633157 |
| H  | -0.46681 | 2.815583 | -2.06547 | C | 1.199802 | -3.67839 | 1.067077 |
| H  | 1.696973 | 1.287726 | -2.58937 | H | -0.17457 | -2.5261  | 2.397659 |
| H  | 3.718491 | 2.166998 | -1.06264 | H | 1.863904 | -0.7743  | 2.581323 |
| H  | 2.823794 | 4.25822  | 0.389613 | H | 3.892013 | -1.69418 | 1.090519 |
| H  | 0.241446 | 4.649577 | -0.22816 | H | 3.119834 | -4.0408  | -0.01376 |
| Cu | -0.86379 | -0.00043 | -0.00027 | H | 0.603436 | -4.53419 | 0.788973 |
| C  | -2.83581 | -0.0004  | 0.000157 | C | -5.19743 | 0.475571 | -0.40649 |
| N  | -3.67484 | 0.068857 | -1.06994 | C | -4.96554 | 1.110787 | 0.767753 |
| C  | -5.00248 | -0.04228 | 0.67672  | C | -3.01779 | 0.176037 | 0.109375 |
| C  | -5.00289 | 0.041707 | -0.67512 | N | -3.9961  | -0.09379 | -0.79466 |
| H  | -5.81761 | -0.08232 | 1.379022 | H | -6.09779 | 0.380481 | -0.98901 |
| H  | -5.81843 | 0.081777 | -1.37693 | H | -5.62634 | 1.671726 | 1.406332 |
| N  | -3.67422 | -0.06958 | 1.070756 | N | -3.62748 | 0.918214 | 1.068694 |
| C  | -3.24295 | 0.119131 | -2.46325 | C | -2.98307 | 1.435231 | 2.275953 |
| H  | -2.17424 | 0.317918 | -2.48812 | H | -3.12669 | 2.514917 | 2.336968 |
| H  | -3.43078 | -0.83513 | -2.95737 | H | -3.41148 | 0.959222 | 3.160027 |
| H  | -3.77203 | 0.919169 | -2.98429 | H | -1.91816 | 1.224746 | 2.230812 |
| C  | -3.24147 | -0.1202  | 2.463815 | C | -3.81445 | -0.85133 | -2.03181 |
| H  | -2.17345 | -0.32282 | 2.488092 | H | -4.6284  | -1.56925 | -2.14109 |
| H  | -3.42555 | 0.835079 | 2.95737  | H | -3.80375 | -0.17761 | -2.89091 |



H -3.773 -0.91801 2.985754

H -2.86902 -1.38639 -1.98125

[[{(CO)<sub>2</sub>CpMn]<sub>2</sub>B{Cu(PCy<sub>3</sub>)}}]

|    |          |          |          |
|----|----------|----------|----------|
| Mn | -1.97774 | 0.720931 | 0.217721 |
| Mn | 1.772668 | 1.170961 | -0.19843 |
| B  | -0.10795 | 1.010621 | 0.014186 |
| O  | -2.31674 | -1.78589 | 1.740306 |
| C  | -2.06111 | -0.83376 | 1.116383 |
| O  | -1.55696 | 2.226113 | 2.700728 |
| C  | -1.71887 | 1.618542 | 1.726881 |
| O  | 0.970986 | 3.004877 | -2.34236 |
| C  | 1.285404 | 2.268885 | -1.50375 |
| O  | 2.42731  | -0.88759 | -2.21235 |
| C  | 2.09008  | -0.13204 | -1.39394 |
| C  | -2.23227 | 1.623602 | -1.75264 |
| H  | -1.44151 | 2.033821 | -2.36036 |
| C  | -2.7275  | 0.290738 | -1.80359 |
| H  | -2.36653 | -0.49557 | -2.44833 |
| C  | -3.80573 | 0.189104 | -0.87689 |
| H  | -4.38743 | -0.69858 | -0.6784  |
| C  | -3.98071 | 1.450553 | -0.25661 |
| H  | -4.71511 | 1.693291 | 0.495761 |
| C  | -3.00325 | 2.339054 | -0.79536 |
| H  | -2.87675 | 3.378229 | -0.5327  |
| C  | 2.594451 | 0.574895 | 1.75154  |
| C  | 1.906476 | 1.814561 | 1.883826 |
| C  | 2.55627  | 2.763212 | 1.048682 |
| C  | 3.650681 | 2.115533 | 0.40236  |
| C  | 3.667994 | 0.766025 | 0.834283 |
| H  | 2.363281 | -0.33652 | 2.280422 |
| H  | 1.065448 | 2.011199 | 2.529814 |
| H  | 2.273959 | 3.798552 | 0.932527 |
| H  | 4.335962 | 2.569568 | -0.29653 |
| H  | 4.373453 | 0.011621 | 0.519553 |
| Cu | 0.117137 | -0.98381 | -0.0462  |
| P  | 0.387492 | -3.2545  | -0.03784 |
| C  | -0.9293  | -4.18331 | -0.93547 |
| H  | -0.76944 | -5.26279 | -0.86782 |
| H  | -1.89989 | -3.93603 | -0.50233 |
| H  | -0.93399 | -3.88937 | -1.98688 |
| C  | 1.939656 | -3.93494 | -0.76261 |
| H  | 1.944133 | -5.02786 | -0.73272 |
| H  | 2.043422 | -3.5938  | -1.79345 |

[[{(CO)<sub>2</sub>CpMn]<sub>2</sub>B{Au(PCy<sub>3</sub>)}}]

|    |          |          |          |
|----|----------|----------|----------|
| Au | -1.21703 | 0.320054 | 0.155464 |
| Mn | 1.615402 | -1.80285 | -0.24082 |
| Mn | 0.901955 | 1.908981 | 0.166509 |
| B  | 1.025848 | -0.05425 | -0.02661 |
| O  | -0.39535 | -2.32056 | -2.31067 |
| C  | 0.408197 | -2.09698 | -1.49905 |
| O  | 3.540097 | -0.66427 | -2.12846 |
| C  | 2.771018 | -1.12336 | -1.39073 |
| O  | 2.981813 | 1.225049 | 2.103917 |
| C  | 2.143144 | 1.462167 | 1.346572 |
| O  | -0.79564 | 2.784202 | 2.417532 |
| C  | -0.18026 | 2.374519 | 1.530088 |
| C  | 1.593268 | -2.05549 | 1.924536 |
| H  | 1.224395 | -1.32238 | 2.624443 |
| C  | 0.835205 | -3.10376 | 1.333811 |
| H  | -0.21213 | -3.30016 | 1.500924 |
| C  | 1.71564  | -3.87667 | 0.515454 |
| H  | 1.441235 | -4.73717 | -0.07513 |
| C  | 3.003302 | -3.29869 | 0.593708 |
| H  | 3.883526 | -3.64102 | 0.071609 |
| C  | 2.933976 | -2.16722 | 1.462511 |
| H  | 3.751117 | -1.51798 | 1.73408  |
| C  | 0.089102 | 2.831865 | -1.66392 |
| C  | 1.202899 | 2.004628 | -1.99054 |
| C  | 2.344783 | 2.520964 | -1.32257 |
| C  | 1.937184 | 3.666149 | -0.57187 |
| C  | 0.548772 | 3.856885 | -0.79257 |
| H  | -0.91834 | 2.714652 | -2.02928 |
| H  | 1.189767 | 1.152987 | -2.65142 |
| H  | 3.340877 | 2.110802 | -1.37794 |
| H  | 2.573835 | 4.284018 | 0.041888 |
| H  | -0.05891 | 4.634916 | -0.35595 |
| P  | -3.32842 | -0.76094 | -0.09893 |
| C  | -3.40324 | -2.47203 | 0.568006 |
| H  | -2.64087 | -3.07894 | 0.077484 |
| H  | -3.20128 | -2.45777 | 1.640344 |
| H  | -4.38681 | -2.91596 | 0.392192 |
| C  | -4.7739  | 0.076534 | 0.671272 |
| H  | -4.61308 | 0.162397 | 1.747297 |
| H  | -4.87216 | 1.082999 | 0.261076 |

|   |          |          |          |   |          |          |          |
|---|----------|----------|----------|---|----------|----------|----------|
| H | 2.796436 | -3.55761 | -0.20116 | H | -5.69649 | -0.48044 | 0.486563 |
| C | 0.343311 | -4.01269 | 1.641835 | C | -3.80063 | -0.95913 | -1.86279 |
| H | -0.59373 | -3.74163 | 2.130544 | H | -3.88465 | 0.02415  | -2.32905 |
| H | 0.42582  | -5.10128 | 1.584364 | H | -3.0166  | -1.51812 | -2.37689 |
| H | 1.16946  | -3.6256  | 2.241679 | H | -4.7533  | -1.48686 | -1.95935 |

## References.

1. H. Braunschweig, M. Buzler, R. D. Dewhurst and K. Radacki, *Angew. Chem. Int. Ed.* 2008, **47**, 5650–5653.
2. Prepared by a variation on the methods in: P. Braunstein, H. Lehner and D. Matt, *Inorg. Synth.* 1990, **27**, 218.
3. H. Braunschweig, K. Kraft, S. Ostreicher, K. Radacki and F. Seeler, *Chem. Eur. J.*, 2010, **16**, 10635.
4. W. L. F. Armarego and C. L. L. Chai, *Purification of Laboratory Chemicals; 6 ed.*, Elsevier: Oxford, **2009**.
5. G. M. Sheldrick, *Acta Crystallogr., Sect. A Found. Crystallogr.* 2008, **A64**, 112.
6. C. B. Huebschle, G. M. Sheldrick, B. Dittrich, *J. Appl. Crystallogr.* 2011, **44**, 1281.
7. C. Cason, et al.; Persistence of Vision Pty. Ltd., 2009; <http://www.povray.org/download/>.
8. (a) G. te Velde, F. M. Bickelhaupt, E. J. Baerends, C. Fonseca Guerra, S. J. A. van Gisbergen, J. G. Snijders, and T. Ziegler. *J. Comp. Chem.*, 2001, **22**, 931; (b) Amsterdam Density Functional, Theoretical Chemistry, Vrije Universiteit, Amsterdam, The Netherlands, <http://www.scm.com>.
9. (a) N. C. Handy and A. J. Cohen, *Mol. Phys.*, 2001, **99**, 403; (b) D. P. Chong, *Mol. Phys.*, 2005, **103**, 749; (c) D. P. Chong, E. van Lenthe, S. J. A. van Gisbergen and E. J. Baerends, *J.*

- Comp. Chem.*, 25, **2004**, 1030; (e) E. van Lenthe and E. J. Baerends. *J. Comp. Chem.*, 2003, **24**, 1142; (f) R. C. Raffenetti, *J. Chem. Phys.*, 1973, **59**, 5936.
10. (a) E. van Lenthe, E. J. Baerends, and J. G. Snijders, *J. Chem. Phys.*, 1993, **99**, 4597; (b) E. van Lenthe, E. J. Baerends and J. G. Snijders, *J. Chem. Phys.*, 1994, **101**, 9783; (c) E. van Lenthe, A. E. Ehlers and E. J. Baerends. *J. Chem. Phys.*, 1999, **110**, 8943; (d) R. Bouten, E. J. Baerends, E. van Lenthe, L. Visscher, G. Schreckenbach and T. Ziegler, *J. Phys. Chem. A*, 2000, **104**, 5600.
11. (a) I. Mayer, *Chem. Phys. Lett.*, 1983, **97**, 270; (b) E. P. Fowe, B. Therrien, G. Süß-Fink, and C. Daul, *Inorg. Chem.*, 2008, **47**, 42.
12. (a) F. L. Hirshfeld. *Theo. Chim. Acta*, 1993, **44**, 129; (b) K. B. Wiberg and P. R. Rablen. *J. Comp. Chem.*, 1993, **14**, 1504.
13. S. Grimme, S. Ehrlich, and L. Goerigk, *J. Comp. Chem.*, 2011, **32**, 1456.
14. Jmol: an open-source Java viewer for chemical structures in 3D. <http://www.jmol.org/>.
15. Gaussian 09, Revision D.01, M. J. Frisch, G. W. Trucks, H. B. Schlegel, G. E. Scuseria, M. A. Robb, J. R. Cheeseman, G. Scalmani, V. Barone, B. Mennucci, G. A. Petersson, H. Nakatsuji, M. Caricato, X. Li, H. P. Hratchian, A. F. Izmaylov, J. Bloino, G. Zheng, J. L. Sonnenberg, M. Hada, M. Ehara, K. Toyota, R. Fukuda, J. Hasegawa, M. Ishida, T. Nakajima, Y. Honda, O. Kitao, H. Nakai, T. Vreven, J. A. Montgomery, Jr., J. E. Peralta, F. Ogliaro, M. Bearpark, J. J. Heyd, E. Brothers, K. N. Kudin, V. N. Staroverov, R. Kobayashi, J. Normand, K. Raghavachari, A. Rendell, J. C. Burant, S. S. Iyengar, J. Tomasi, M. Cossi, N. Rega, J. M. Millam, M. Klene, J. E. Knox, J. B. Cross, V. Bakken, C. Adamo, J. Jaramillo, R. Gomperts, R. E. Stratmann, O. Yazyev, A. J. Austin, R. Cammi, C. Pomelli, J. W. Ochterski, R. L. Martin, K. Morokuma, V. G.

Zakrzewski, G. A. Voth, P. Salvador, J. J. Dannenberg, S. Dapprich, A. D. Daniels, Ö. Farkas, J. B. Foresman, J. V. Ortiz, J. Cioslowski, and D. J. Fox, Gaussian, Inc., Wallingford CT, 2009.
